# Supplementary material for: Global Analysis of Mouse Polyomavirus Infection Reveals Dynamic Regulation of Viral and Host Gene Expression and Promiscuous Viral RNA Editing
Source: PLoS Pathog. 2015 Sep 25;11(9):e1005166. doi: 10.1371/journal.ppat.1005166 (PMC4583464; doi:10.1371/journal.ppat.1005166)
Supplement: S4 Table — Excel spreadsheet listing significant differentially expressed genes between Mock and PyV infected samples for each time point across all three replicates. (XLSX) [file ppat.1005166.s012.xlsx]

## Sheet: Mocks_vs_PyV_sig_diff_full_tabl
Gene	mock_fpkm_12	infected_fpkm_12	avg_log2_fpkm_12	log2_ratio_12	mock_fpkm_18	infected_fpkm_18	avg_log2_fpkm_18	log2_ratio_18	mock_fpkm_24	infected_fpkm_24	avg_log2_fpkm_24	log2_ratio_24	mock_fpkm_36	infected_fpkm_36	avg_log2_fpkm_36	log2_ratio_36
Serpinb2													0.0988864	1.56671	-1.34517	3.98582
Fam154b													0.121549	1.29766	-1.33224	3.4163
Rpph1									2415.26	10785.8	12.3174	2.15888	1010.52	6872.13	11.3637	2.76566
Rprl3									520.94	2118.74	10.037	2.02402	208.38	1313.5	9.03114	2.65613
Cxcl10													9.10355	56.3803	4.50177	2.63069
Acsbg1									0.524175	1.78612	-0.0475253	1.76871	0.216106	1.23191	-0.954646	2.51109
Saa3													0.735111	3.87419	0.754964	2.39786
Il6													0.969659	4.4256	1.05071	2.19032
1700094D03Rik													0.292621	1.33443	-0.678336	2.18912
Ccdc151													0.212167	0.962614	-1.14585	2.18176
Ccl5													1.79466	7.92961	1.91548	2.14354
Gm12603													1.04712	4.36748	1.09661	2.06037
Anxa8					5.15493	20.5137	3.36223	1.99256	5.90624	22.4451	3.52528	1.92609	6.75426	27.2313	3.7615	2.0114
Rsad2													0.882733	3.54934	0.8238	2.0075
Tgtp1													0.419234	1.53903	-0.316076	1.87619
Rab20													2.57591	9.39081	2.29817	1.86617
Dnajc15													3.53033	12.819	2.75001	1.86041
Ifit1													8.29817	29.5738	3.96952	1.83345
Oas1b													1.42247	5.023	1.41847	1.82015
Oasl1													0.520591	1.83329	-0.0336714	1.81621
Rmrp													3242.39	11171.4	12.5552	1.78468
Angptl4									6.54626	18.6705	3.46668	1.51202	4.07652	13.9071	2.91254	1.77041
Mx2													1.79507	5.8515	1.69642	1.70477
Lrrc48													0.380769	1.23064	-0.546802	1.69242
Gm11974													12.5134	40.2499	4.48816	1.68551
3300005D01Rik													2.32002	7.44939	2.05563	1.68299
Terc													7.46889	23.7667	3.73588	1.66998
Slfn2													1.749	5.38682	1.61798	1.6229
Ovgp1													0.452536	1.36922	-0.345271	1.59725
Chchd1													11.5322	34.7916	4.32413	1.59307
Zbp1													2.32203	6.94895	2.00609	1.58141
Lrr1													2.89599	8.47924	2.309	1.54988
Upp1									1.10521	3.80988	1.03703	1.78543	1.26243	3.64811	1.10168	1.53095
Kbtbd3													0.447767	1.29342	-0.393995	1.53037
Tex30													11.9615	34.2949	4.34012	1.5196
Rpl22l1													10.1444	28.9246	4.09842	1.51161
Hist1h1a									56.3805	145.977	6.50336	1.37247	57.4485	162.115	6.59254	1.49668
Mx1													1.14715	3.23273	0.945404	1.4947
C030034I22Rik													0.610664	1.7009	0.0273745	1.47785
Maff													9.33493	25.9766	3.96089	1.4765
Rpl41													999.574	2733.23	10.6908	1.45122
Hist4h4									16.5932	43.8254	4.75311	1.40118	15.6098	42.0516	4.67923	1.42971
Rtp4													8.42968	22.4681	3.78264	1.41433
Cenpl													3.73928	9.92633	2.60701	1.4085
1600020E01Rik													3.68626	9.77136	2.58536	1.4064
Snhg1													63.554	166.559	6.6849	1.38998
Fam229b													2.32642	6.05428	1.90803	1.37984
Uqcrq													41.7125	108.379	6.07117	1.37753
Wdr78													0.60516	1.5668	-0.0383952	1.37243
Dyrk3													1.63528	4.21279	1.39216	1.36524
Ddx60													0.408428	1.05199	-0.609363	1.36497
Acn9													3.25113	8.26119	2.37365	1.34541
Cxcl1													34.3108	86.9933	5.77171	1.34224
Zfp472													3.859	9.67487	2.61123	1.32602
Siah1b													9.87182	24.6105	3.96226	1.31789
Phf7													1.95901	4.86246	1.62591	1.31156
Usp18													7.43863	18.4146	3.54891	1.30774
Tomm5													44.8701	110.996	6.14102	1.30668
Hist1h3a													81.0938	198.556	6.98746	1.29188
Smim3													2.62229	6.41457	2.03609	1.29053
Timm8a1													60.4758	147.222	6.56007	1.28356
Hist2h4													154.254	374.586	7.90916	1.27999
Mrpl46													9.26748	22.4633	3.85084	1.27732
Isg15													13.1902	31.8721	4.35781	1.27283
Hp									4.08263	13.8506	2.91069	1.76238	3.15109	7.60945	2.29182	1.27194
Ier2													11.6167	28.0068	4.17292	1.26958
Plac8													130.491	314.191	7.66165	1.26769
N4bp3													2.27981	5.4472	1.81721	1.2566
Rfc3													41.1889	97.7435	5.98756	1.24675
Iigp1													2.12731	5.04338	1.71171	1.24536
Zfp119b													3.9111	9.25698	2.58906	1.24297
Actr6													2.99238	7.00906	2.19526	1.22793
Junb									45.8656	102.881	6.10209	1.16549	48.6008	113.486	6.21464	1.22346
Traf1													1.06491	2.46906	0.697347	1.21323
Prim1													37.0433	85.1727	5.81173	1.20118
Hist1h4i													88.3027	201.488	7.05947	1.19016
Nup35													15.6663	35.6785	4.56329	1.18739
Nxt1													24.4247	55.5872	5.20347	1.18641
Rps27a													136.822	311.272	7.68909	1.18588
Rgs16													3.64393	8.26037	2.45585	1.18071
Rps14													245.741	554.023	8.5274	1.17281
Snrpe													102.889	231.487	7.26987	1.16984
Commd2													4.90433	11.0155	2.87776	1.16741
Apitd1													3.2927	7.38563	2.302	1.16545
Zfp429													2.0192	4.52675	1.59613	1.16469
Tnfrsf12a													116.297	260.712	7.44399	1.16464
Pop5													10.5795	23.6827	3.98448	1.16256
Ppih													20.0858	44.8689	4.90787	1.15954
Orc6													45.9323	102.553	6.10083	1.15879
Timp1													227.746	508.393	8.41054	1.15852
Hddc2													8.24594	18.3357	3.62013	1.1529
Tipin													43.2355	95.8157	6.00817	1.14805
Mtfr2													2.13558	4.72868	1.66803	1.14681
Tnfrsf9													2.94408	6.51866	2.1312	1.14676
1810037I17Rik													30.204	66.8187	5.48942	1.14551
Ormdl1													8.45673	18.6894	3.65212	1.14405
Bbs5													5.59889	12.3706	3.05699	1.1437
Hist1h4c									213.772	461.143	8.2945	1.10914	208.125	458.655	8.27129	1.13996
Lsm7													23.5033	51.7419	5.12403	1.13847
Mrpl12													8.09356	17.8054	3.58551	1.13747
Ptrh1													6.04635	13.2885	3.16409	1.13604
Pdcd10													13.5663	29.7376	4.32809	1.13226
Med21													14.7263	32.2464	4.44569	1.13074
Psmg4													19.3913	42.4593	4.84267	1.13067
Dhfr													21.9113	47.9379	5.01835	1.12949
Rpl39l													53.0315	116.019	6.2935	1.12944
Hist1h3f													36.0181	78.672	5.73421	1.12713
Igtp													3.97235	8.67142	2.55313	1.12628
Ccne1													13.9729	30.3851	4.36493	1.12073
Prmt1													30.9968	67.3552	5.51388	1.11967
Arrdc3													12.1202	26.226	4.15613	1.11358
Dctpp1													39.7754	85.5253	5.86604	1.10447
Rpl17													205.38	441.584	8.23435	1.10439
Sat1													32.4863	69.686	5.57228	1.10104
Ndufaf2													14.3781	30.7536	4.39424	1.09688
Immp1l													10.8002	23.0256	3.97908	1.09218
2410006H16Rik													90.1528	192.078	7.03992	1.09125
Hist1h4m,Hist1h4n													179.048	381.363	8.02961	1.09082
Mrto4													57.3385	122.008	6.38613	1.0894
Get4													32.6326	69.3073	5.57159	1.08669
Nme6													16.014	34.0016	4.5444	1.08627
Efcab7													4.64897	9.82042	2.75635	1.07887
Tm4sf1													53.5782	113.071	6.28233	1.07751
Mrpl14													32.7526	68.9637	5.57065	1.07423
Hist1h3e													500.176	1051.67	9.50238	1.07217
Rps24													414.422	870.918	9.23067	1.07144
Gins1													12.2768	25.6638	4.14976	1.0638
Rpl9													528.519	1104.22	9.57731	1.063
Bloc1s2a													13.4203	28.0188	4.27733	1.06198
Npm3													61.5485	128.457	6.4744	1.06149
Cenpw													8.51865	17.7639	3.62075	1.06025
Oas1a													3.77924	7.87447	2.44764	1.05909
Hist1h3b													34.4996	71.7091	5.6363	1.05558
Gtf2a2													19.4551	40.4022	4.80922	1.05429
Gm14295													65.4525	135.902	6.5594	1.05405
Mrps33													19.1371	39.7261	4.78516	1.05371
Hist1h4j													92.381	191.611	7.05578	1.05251
Cenph													13.2813	27.4972	4.25627	1.04989
Gem													3.38716	7.00899	2.28464	1.04913
Scarna13													58.7654	121.585	6.40136	1.04893
Itpa													33.4894	69.2581	5.58977	1.04828
H2afz													420.098	867.031	9.23726	1.04536
Ercc8													4.9384	10.1775	2.82568	1.04327
Rad51ap1													20.1838	41.4398	4.85404	1.03782
Mrpl20													63.5314	130.226	6.50714	1.03548
Nup37													24.076	49.3205	5.10682	1.03459
Cycs													42.3298	86.5521	5.91955	1.0319
Hspe1													231.172	471.008	8.36622	1.02678
Zfp948													22.8619	46.5675	5.02806	1.02638
Zbtb48													2.80478	5.71112	2.00083	1.02589
Pcna													269.143	547.765	8.58482	1.02518
Snrpd2													100.717	204.675	7.16568	1.02303
Ppil1													46.9396	95.0798	6.0619	1.01833
Polr2g													40.869	82.5196	5.8598	1.01373
Eef1e1													24.5115	49.4659	5.12187	1.01298
Fam195a													7.50983	15.1366	3.41437	1.01119
Mettl21d													8.30252	16.7189	3.55848	1.00986
Fam162a													50.8383	102.315	6.17236	1.00903
Dph3													5.70408	11.4744	3.01617	1.00835
Timm13													21.1303	42.492	4.90518	1.00788
Rps27l													85.432	171.75	6.92044	1.00746
Cinp													10.8234	21.7546	3.93967	1.00717
Pin1													10.8398	21.7807	3.94162	1.00671
Gng10													30.4885	61.1771	5.43256	1.00473
Polb													12.5558	25.1671	4.15187	1.00319
Bok													10.9679	21.9684	3.95629	1.00214
Rangrf													28.3753	56.7253	5.32624	0.999357
Gmnn													16.2886	32.5031	4.52415	0.996715
Lsm3													61.174	122.009	6.43285	0.995997
0610009D07Rik													17.7145	35.3284	4.64481	0.995898
Zfp593													4.33156	8.63835	2.61282	0.995869
Atp5e													49.8538	99.4152	6.13751	0.995763
Prkg2													8.04722	16.0253	3.50538	0.993789
Nhp2													56.8086	113.104	6.32477	0.993469
Zfp367													26.398	52.5518	5.21901	0.993312
Slc25a33													7.03651	14.0066	3.31145	0.993175
Hat1													62.3067	123.965	6.45755	0.992474
Trip13													28.4748	56.5936	5.32709	0.990953
Pfdn4													13.0311	25.8471	4.19791	0.988044
Cdca5													11.1299	22.0501	3.96954	0.986345
Il13ra1													33.4	66.0831	5.55399	0.984433
Gemin6													20.3373	40.1732	4.83711	0.982105
Rabl5													13.521	26.7086	4.24818	0.982102
Ndufb4													44.3138	87.3195	5.95896	0.978548
Hint1													162.319	319.572	7.83134	0.977309
Casp4													17.5117	34.3793	4.61686	0.973221
Nmral1													13.8464	27.159	4.2774	0.971919
Hist1h4h													213.13	417.85	8.22122	0.971251
Mrps23													15.7142	30.7906	4.45921	0.970421
Atp5l													97.0021	189.691	7.08373	0.967563
Dnaaf2													6.30753	12.2977	3.1387	0.963241
Dtymk													44.4944	86.7445	5.95713	0.963149
Hmgb2													41.3222	80.5024	5.8499	0.962115
C1d													7.251	14.1169	3.33877	0.961171
Dnajc9													42.2448	82.2364	5.8812	0.961003
Hist1h3g													77.9903	151.739	6.76534	0.960225
Timm10													22.7582	44.2661	4.98822	0.959816
Hist1h1b													118.828	231.033	7.37234	0.959224
Wdr76													6.98685	13.5839	3.28423	0.959184
Hist2h2bb													692.121	1345.31	9.9143	0.958842
Prl2c2													30.0758	58.4548	5.38989	0.958718
Polr2h													44.9619	87.3232	5.96946	0.957662
Ndufaf5													3.93811	7.64706	2.4562	0.957402
Wrap53													4.22216	8.19539	2.5564	0.956831
2700094K13Rik													80.3367	155.885	6.80616	0.956351
Shq1													7.19368	13.9451	3.32421	0.954956
Cox7b													44.3224	85.6674	5.94532	0.95071
Gins3													9.98999	19.2757	3.7946	0.948228
Sec61g													24.7082	47.6508	5.10067	0.947511
Rrp9													27.5606	53.109	5.25771	0.946349
Hist1h4f													78.1288	150.553	6.76096	0.946345
Mrpl49													28.4375	54.7236	5.30191	0.944369
Rpa3													36.3053	69.8458	5.6541	0.943993
Rps18													1063.71	2044.85	10.5263	0.94289
Rps3													249.407	479.103	8.43328	0.941834
Vps29													38.141	73.2311	5.72383	0.941114
Rpl5													307.76	590.224	8.73539	0.939457
Mrpl11													5.97787	11.453	3.04864	0.938022
Rpl35a													330.553	633.01	8.83741	0.937347
Rpl34-ps1													358.506	686.347	8.95432	0.936941
Traip													6.02949	11.5432	3.0605	0.936935
Cd63													188.103	360.105	8.02383	0.936895
Hist1h1d													37.6047	71.9892	5.70127	0.936867
Mrpl13													75.8132	144.854	6.71142	0.934079
Banf1													74.2712	141.812	6.68128	0.933105
Mad2l1													44.3239	84.6015	5.93631	0.932598
Med28													8.07884	15.4187	3.48038	0.932461
Exosc5													10.8771	20.6882	3.90698	0.927514
Dnph1													24.8251	47.2077	5.09734	0.927223
Dcun1d5													47.7346	90.7499	6.04039	0.926861
Polr2d													16.1829	30.7509	4.47948	0.926158
Tnfaip3													3.40827	6.46628	2.23099	0.923896
Lsm1													11.1866	21.1833	3.94428	0.921156
Blvra													15.6857	29.6989	4.43186	0.92096
Atp6v0b													67.8886	128.15	6.54339	0.916592
Klf10													17.0977	32.2694	4.55391	0.916364
Nsmce1													19.8297	37.3819	4.76693	0.914677
Nip7													25.6173	48.1858	5.13479	0.91149
Zfp944													7.10645	13.3648	3.28475	0.911237
Fbxo5													29.0085	54.5218	5.31358	0.910357
Ppa1													94.5689	177.707	7.01833	0.910063
Ereg													7.06254	13.2626	3.27474	0.909105
Mrpl32													24.9005	46.6995	5.09172	0.907232
Nup43													30.7048	57.5596	5.39369	0.906592
Cnbp													186.685	349.962	7.99776	0.906592
Eef1b2													103.101	193.263	7.14117	0.906507
Cdc6													11.4474	21.4443	3.96974	0.905574
Ccdc115													6.656	12.4678	3.1874	0.90548
Chchd4													20.0013	37.4442	4.77435	0.904648
Timm23													109.199	203.966	7.2215	0.901369
Abracl													29.0282	54.1424	5.30904	0.899304
Mrpl1													10.2872	19.1593	3.81138	0.897194
Ifi202b													62.776	116.834	6.42023	0.896175
Dpy30													54.0881	100.461	6.20387	0.893252
Mrpl28													72.0483	133.816	6.6175	0.893214
Nme2													373.058	692.551	8.98952	0.89252
AI413582													20.2033	37.4525	4.78175	0.890471
Sptssa													17.9762	33.31	4.61295	0.889867
Exosc2													31.9406	59.1794	5.44217	0.889704
Uchl3													50.858	94.1991	6.11302	0.889239
Med4													18.5331	34.2784	4.65563	0.887196
Wdr55													17.8079	32.9192	4.59765	0.886412
Mis18a													14.1309	26.1108	4.26368	0.885793
Anapc15													30.2887	55.964	5.36357	0.885719
Hist1h2ac													8.78185	16.2191	3.57707	0.885097
Rpl13a													263.958	487.252	8.48634	0.88436
Naa20													50.0482	92.3634	6.08725	0.884003
Tyms													22.4559	41.4142	4.93054	0.883031
Orc1													6.32457	11.6624	3.10238	0.882825
Taf9													125.204	230.446	7.40821	0.880148
Ran													279.371	514.056	8.56591	0.879743
Polr2c													39.9306	73.4479	5.75904	0.879226
Yrdc													22.9776	42.2072	4.96079	0.877261
Hist1h3h													166.774	306.037	7.81966	0.875812
Prpf38a													29.0847	53.3689	5.30006	0.875739
Pno1													42.2455	77.3906	5.83741	0.873361
Rcc1													21.4755	39.3267	4.86103	0.872817
Ube2v2													11.7077	21.3923	3.9842	0.869634
Rnf7													40.3959	73.7999	5.77084	0.86941
Eed													13.8338	25.2618	4.22451	0.86876
Psma7													112.931	206.217	7.25366	0.868722
Tceb1													45.0843	82.3236	5.92889	0.868681
Rpf2													38.6592	70.4591	5.70573	0.865974
Shmt1													27.0846	49.2757	5.1911	0.863404
2810417H13Rik													60.7835	110.464	6.35652	0.861825
Rpp30													28.1333	51.126	5.2451	0.861778
Tpt1													622.745	1131.09	9.713	0.861
Tssc4													15.9976	29.0488	4.4301	0.860623
Pbk													34.7521	63.0938	5.54923	0.860398
Pfdn1													33.2684	60.354	5.48573	0.859297
Polr1d													88.7433	160.769	6.90021	0.857279
Psma3													104.873	189.958	7.14102	0.857037
Mrps22													19.166	34.6955	4.68858	0.856199
Ccl2													95.3847	172.601	7.00349	0.855611
Rpl15													349.033	631.452	8.87487	0.85531
Dimt1													11.3316	20.4739	3.929	0.853434
Erh													98.2524	177.437	7.04479	0.852742
Snrpg													155.944	281.553	7.71107	0.852378
Sec61b													63.2715	113.952	6.40788	0.848799
Psmd10													17.238	31.0141	4.53119	0.847332
Errfi1													23.3694	42.036	4.97005	0.847005
Slbp													91.9631	165.346	6.94616	0.846361
Birc5													55.9992	100.563	6.22965	0.844621
Eif6													89.7826	161.209	6.91058	0.844425
Cenpa													29.6962	53.2608	5.3136	0.842796
Hist1h2bm													234.732	420.732	8.29581	0.841887
Cenpq													31.7353	56.8403	5.40843	0.840826
Rps7													347.959	621.753	8.86149	0.837424
Orc2													31.6272	56.5125	5.4018	0.837404
Snrpd1													56.0466	100.094	6.22688	0.836657
Fau													452.468	807.172	9.2392	0.83506
Rps10													770.237	1371.08	10.0051	0.831938
Depdc1a													26.2508	46.7201	5.13013	0.831682
3230401D17Rik													31.2114	55.4228	5.3782	0.828407
Wbp5													146.851	260.607	7.61197	0.827523
Pycrl													24.0465	42.6563	5.00122	0.826932
Polr1c													76.186	135.141	6.66489	0.826868
Yars2													23.3834	41.437	4.96013	0.825435
Lsm4													58.8746	104.327	6.29227	0.825395
Rpl35													788.871	1395.75	10.0352	0.823179
Cacybp													81.3143	143.667	6.75601	0.821148
Ccnl1													16.4653	29.0834	4.45174	0.820767
Cpsf4													20.4993	36.1927	4.76756	0.820124
Tk1													57.6772	101.663	6.25879	0.817722
Coq10b													21.2718	37.4669	4.81921	0.816674
Yaf2													14.6231	25.7485	4.2783	0.816239
Nme1													107.888	189.934	7.16137	0.815964
Tbca													96.9376	170.621	7.00682	0.815667
Dut													28.9175	50.8263	5.26069	0.813632
Kif18a													17.2948	30.3401	4.51771	0.810888
Dbr1													15.9364	27.9455	4.3994	0.81029
Hist1h4a													182.942	320.701	7.92016	0.809843
Slc25a5													291.959	509.506	8.59129	0.803333
1810009A15Rik													56.3322	98.2171	6.2169	0.802014
Ldha													525.351	913.69	9.43635	0.798423
Cyc1													65.6106	114.059	6.43475	0.797779
Chaf1b													26.8006	46.5592	5.14259	0.796801
Ssr4													80.9977	140.699	6.73814	0.796659
Rpl36													911.431	1582.65	10.2301	0.796137
Uqcrh													87.3603	151.686	6.84693	0.796038
Ddx20													20.0327	34.7819	4.72227	0.79598
Mrpl40													24.9577	43.328	5.03932	0.795815
Tma7													86.094	149.36	6.82525	0.794809
Bnip3													57.453	99.6229	6.24136	0.794095
Hist2h2ac													276.455	478.661	8.50688	0.79196
Wdr4													11.7411	20.3114	3.94886	0.790722
Psmd13													44.0821	76.1611	5.85655	0.788861
Mrps7													48.4461	83.677	5.99253	0.788451
Rpl27													445.658	769.274	9.19357	0.787561
Nudcd2													30.1364	52.0142	5.30713	0.787398
Sumo3													34.5297	59.5458	5.50285	0.786162
Rpa2													28.6022	49.2878	5.23061	0.785104
Hist1h4k													302.217	519.543	8.63027	0.781658
Nmd3													31.4458	54.0394	5.36537	0.781144
Cox7a2													68.2893	117.283	6.48372	0.780262
Cops5													39.7576	68.2746	5.70322	0.780118
Smim15													30.5312	52.4287	5.32225	0.780072
Il4ra					8.26888	21.4314	3.73467	1.37396	8.68755	18.8047	3.67599	1.11407	9.35109	16.0569	3.61513	0.779987
Rpl12													774.238	1329.12	9.98644	0.779622
Pgp													47.7912	81.9891	5.96802	0.778687
Rbm7													47.3469	81.2221	5.9545	0.778602
Tomm20													34.2387	58.7102	5.48655	0.777983
Ppp1r14b													123.307	210.851	7.3331	0.773969
Fen1													29.5858	50.5459	5.27318	0.772689
Eif1													87.3318	149.003	6.83382	0.770762
Ap1s1													59.3156	101.041	6.27457	0.768457
Ostc													71.0058	120.901	6.53377	0.767817
Psmb5													77.3077	131.589	6.65622	0.767355
Mcm10													13.2345	22.4979	4.10898	0.765487
Ier5													12.9041	21.9227	4.07206	0.764596
Eif3i													117.261	199.022	7.25518	0.763205
Oaz1													152.204	257.374	7.62879	0.75786
Srsf7													57.9008	97.8953	6.23434	0.757656
Ppp1r8													38.6933	65.2883	5.65138	0.754741
Rfc2													44.2507	74.5167	5.84356	0.751864
Rwdd1													51.9498	87.2772	6.07329	0.748487
Xdh													42.124	25.0358	5.02125	-0.75065
Capn6													64.4235	38.0419	5.62952	-0.759998
Utp20													22.2243	13.1008	4.09282	-0.762483
Dcaf7													28.2267	16.6352	4.43758	-0.762821
Lss													134.668	79.2145	6.69048	-0.765571
Anapc1													41.5822	24.4421	4.9946	-0.766598
Abr													12.3678	7.26607	3.24485	-0.767342
Man2a1													59.5961	34.9701	5.5126	-0.769096
Ppp1r12a													26.4871	15.5418	4.34265	-0.769136
Nup98													29.2233	17.1407	4.4842	-0.769693
C1ra													28.5826	16.7278	4.45062	-0.772889
Matn2													25.1736	14.7299	4.26726	-0.773164
Grina													100.572	58.6846	6.2635	-0.777175
Aplp2													132.463	77.1621	6.65963	-0.779625
Atp2b1													25.3001	14.7189	4.27033	-0.781473
Erbb2ip													59.4169	34.5114	5.5009	-0.7838
Slc44a2													33.4132	19.3885	4.66974	-0.785217
Zfp871													15.6141	9.05147	3.57146	-0.786625
Oxr1													67.9298	39.302	5.69125	-0.789442
Arhgef2													37.1244	21.4523	4.81868	-0.791235
Hsd17b7													69.5478	40.1573	5.72376	-0.792343
Igfbp4													96.5687	55.681	6.1963	-0.794371
Sec24c													19.8496	11.4417	3.91363	-0.794809
Cltc													167.578	96.5867	6.99122	-0.794936
Cenpe													16.8967	9.72043	3.67984	-0.797649
Jmy													13.2317	7.60692	3.32662	-0.798614
Ppap2b													22.5448	12.9535	4.095	-0.799453
Ttbk2													4.69556	2.69361	1.83042	-0.801756
Aff4													27.26	15.6228	4.36715	-0.803133
Nipbl													16.7515	9.59745	3.66443	-0.803567
Man2b1													10.6861	6.11663	3.0152	-0.804927
Gli3													6.12448	3.50017	2.21101	-0.807162
Os9													19.0075	10.8601	3.84473	-0.807531
Cyp1b1													114.298	65.255	6.43234	-0.80864
Ndrg1													43.786	24.9879	5.04778	-0.80924
Asxl1													13.3066	7.59267	3.32934	-0.809463
Agap1													8.09952	4.60978	2.61127	-0.813139
Abcc1													24.2655	13.8071	4.19409	-0.813496
S1pr3													19.5881	11.1396	3.88477	-0.81428
2900097C17Rik													83.8489	47.6631	5.98226	-0.814919
2014-03-06													21.7266	12.3451	4.03363	-0.815524
Cnot1													48.8515	27.7572	5.20256	-0.815541
Cdk12													12.5287	7.11636	3.23915	-0.816025
Nfe2l1													71.7921	40.7727	5.75764	-0.816222
Atrx													22.6841	12.8717	4.09487	-0.817479
Ssbp3													30.2818	17.1819	4.5116	-0.817561
Ubap2l													34.6236	19.6424	4.70479	-0.817785
Sp1													23.3886	13.268	4.13881	-0.817855
Cep170													25.0114	14.1841	4.23536	-0.818311
Nr2f2													18.9313	10.7021	3.83126	-0.82288
Tbl1xr1													26.6379	15.0469	4.3234	-0.824014
Zbtb44													8.86956	5.00958	2.73678	-0.824173
Met													54.4515	30.709	5.35374	-0.82631
Wdr81													5.39947	3.04409	2.01941	-0.826807
Pde4dip													16.2294	9.14742	3.60695	-0.827173
Setd2													16.2755	9.16595	3.61046	-0.828346
Ankhd1													7.9698	4.48785	2.58028	-0.828519
Myo9b													17.9536	10.1097	3.75193	-0.828533
Abl1													17.7001	9.96615	3.73136	-0.828649
Lmtk2													7.53087	4.23594	2.49775	-0.830134
Mia3													18.793	10.5646	3.81664	-0.830957
Trim44													12.9455	7.27283	3.27845	-0.831862
Irx2													25.4469	14.2829	4.25282	-0.833201
Zfp292													9.04263	5.07111	2.75952	-0.834441
Sec24d													41.1567	23.0675	4.94542	-0.835266
Pikfyve													9.88955	5.53999	2.88789	-0.836022
Acsl3													88.5637	49.5828	6.05021	-0.836876
Ube3b													25.9297	14.5123	4.27787	-0.837329
Irx1													40.0597	22.4201	4.9054	-0.837359
Sec14l1													37.1283	20.7761	4.79565	-0.837594
Pygb													55.7348	31.1874	5.3817	-0.837615
Emilin1													23.0293	12.8723	4.1058	-0.839201
Iqgap3													13.0319	7.28287	3.28424	-0.839468
Rbm33													4.76256	2.66064	1.83176	-0.839964
Dmxl1													9.1818	5.12839	2.77864	-0.840271
Daam1													6.38032	3.56103	2.25296	-0.841334
Dennd4c													10.0768	5.62173	2.91199	-0.841951
Tmem245													8.77457	4.89301	2.71203	-0.842606
Aco1													44.9255	25.0468	5.06801	-0.842908
Edem3													15.2485	8.49993	3.50902	-0.843144
Syde1													22.7079	12.6527	4.08325	-0.843749
Cad													23.0519	12.8402	4.1047	-0.844218
Esyt1													13.2749	7.39388	3.30848	-0.844297
Eef2k													5.35053	2.97859	1.99716	-0.845052
Gigyf2													9.5186	5.29735	2.82801	-0.845479
Ift122													6.80066	3.78284	2.34257	-0.846205
Patl1													11.1939	6.22118	3.06091	-0.847453
Kif16b													7.09786	3.94465	2.40364	-0.847487
Kdm2a													19.5928	10.8757	3.86764	-0.849215
Lrrc58													50.4077	27.9802	5.23095	-0.849238
Jmjd1c													7.54909	4.19024	2.49167	-0.84927
Meis1													10.9757	6.08561	3.03082	-0.850839
Nuak1													13.9054	7.70907	3.37207	-0.851017
Mmp2													18.1758	10.0746	3.7583	-0.851296
Nbr1													26.3871	14.6212	4.29588	-0.851771
Gm2a													9.93616	5.50388	2.88657	-0.852239
Mical2													12.4192	6.87216	3.20763	-0.853737
Cdc42bpa													9.92632	5.48802	2.88377	-0.854973
Wdr7													4.54297	2.51029	1.75574	-0.855782
Gns													48.563	26.8322	5.17384	-0.855892
Ggcx													20.2957	11.2054	3.91461	-0.85698
Etv5													9.9268	5.47877	2.88259	-0.857477
Dip2a													8.93239	4.92645	2.7298	-0.858498
Foxd1													25.5321	14.0758	4.24469	-0.859095
Rictor													11.7725	6.48803	3.12756	-0.859568
Ccdc6													21.0841	11.6089	3.96762	-0.860924
Rmnd5a													18.6228	10.2496	3.78825	-0.861502
Lgals3bp													43.9215	24.1196	5.02449	-0.864721
Cep110													5.19321	2.85165	1.94421	-0.86483
Zeb1													11.7932	6.46196	3.12593	-0.867912
Hs6st1													11.3577	6.22261	3.07156	-0.868079
Hhip													8.46924	4.63365	2.64719	-0.870083
Nfatc3													31.7084	17.3401	4.55142	-0.870753
Tgfbr2													57.6004	31.4261	5.41095	-0.874116
Ly75													14.0822	7.68121	3.37857	-0.874467
Sipa1l2													6.27754	3.42076	2.21226	-0.875882
Fam120c													5.24683	2.85614	1.95276	-0.877379
Serinc5													10.3977	5.65702	2.93912	-0.87815
Tnrc6c													4.41075	2.39961	1.70191	-0.878224
Itsn1													12.404	6.7444	3.19321	-0.879043
Crim1													26.5729	14.4472	4.2923	-0.879166
Snrk													5.47648	2.97481	2.01302	-0.880451
Heatr6													9.78506	5.30837	2.84942	-0.882312
Kdm5c													21.149	11.4706	3.96119	-0.882649
Taf1													21.9198	11.8842	4.01257	-0.88319
Golim4													14.2892	7.74483	3.39504	-0.88362
Nedd4													408.986	221.604	8.23387	-0.884068
Mmp16													10.1223	5.47965	2.89677	-0.885381
Wrn													9.01016	4.87746	2.72884	-0.885423
Secisbp2l													23.5807	12.7644	4.11679	-0.885481
Kdm4b													7.27796	3.93819	2.42053	-0.886001
Mecp2													6.88542	3.72524	2.34044	-0.886211
Ctdsp2													41.3701	22.3683	4.92695	-0.887133
Ehbp1													7.54518	4.07924	2.47193	-0.887255
Phf8													4.9404	2.669	1.86046	-0.888329
Thbs2													11.4076	6.16126	3.06757	-0.888698
Ddr1													24.1888	13.0639	4.15189	-0.888754
Usp24													14.5081	7.83363	3.41423	-0.889106
Tprn													8.64665	4.66562	2.66711	-0.890072
Arsa													17.4987	9.44149	3.6841	-0.890161
Sin3a													17.7435	9.56997	3.70387	-0.890704
Scarf2													15.1173	8.14635	3.47214	-0.891975
Dicer1													6.18498	3.3329	2.18277	-0.891991
Cabin1													7.40883	3.99077	2.44296	-0.892579
Pip4k2b													25.1059	13.506	4.20274	-0.894426
Ncam1													33.7276	18.128	4.628	-0.89571
Rock2													18.6482	10.019	3.77282	-0.896298
Dnajc13													28.747	15.4389	4.39692	-0.896841
Cdc42bpb													11.741	6.30104	3.10454	-0.897893
Ppp2r3a													12.4711	6.689	3.19115	-0.898726
Wbp2													26.0702	13.9347	4.25247	-0.90372
1810011O10Rik													29.7087	15.8794	4.44095	-0.903729
Tsc22d2													21.1885	11.3175	3.95285	-0.904726
Fscn1													234.419	125.202	7.42053	-0.904832
Bnc2													7.23698	3.86216	2.4024	-0.90598
Ank3													3.51461	1.87338	1.3595	-0.907721
Mrc2													18.2665	9.73118	3.73687	-0.908514
Grlf1													22.1947	11.8146	4.01732	-0.909644
Vcl													76.1382	40.5255	5.79565	-0.90979
Map7d1													20.9023	11.1047	3.92934	-0.912491
Sox12													6.56901	3.48813	2.25906	-0.913222
Mvp													23.9299	12.697	4.12358	-0.914327
Abhd2													13.408	7.1103	3.28747	-0.915112
Nedd9													20.3276	10.7657	3.88687	-0.916998
Tspyl4													7.06105	3.73908	2.36128	-0.917199
Tmem63a													9.90132	5.24225	2.8489	-0.917435
4930402H24Rik													7.1726	3.79742	2.38376	-0.917477
Strn													16.4661	8.70984	3.58204	-0.918781
Esyt2													51.9251	27.4597	5.2388	-0.919116
Golga2													11.7428	6.20628	3.09372	-0.919976
Zyg11b													14.2558	7.53284	3.37334	-0.920283
Olfml2b													35.0331	18.5025	4.67015	-0.920998
4931406P16Rik													7.95728	4.20158	2.5316	-0.921343
Agrn													7.45659	3.93505	2.43745	-0.922134
Taok1													26.3652	13.9131	4.25947	-0.922191
Gas1													151.542	79.8841	6.78171	-0.923737
Rev3l													8.39011	4.42256	2.60679	-0.923808
Kat6b													3.00354	1.58225	1.12432	-0.924686
Arhgef28													3.46468	1.82469	1.33019	-0.925071
Xrn1													6.24686	3.28931	2.18046	-0.925346
Uaca													6.13134	3.22482	2.15271	-0.926984
2210018M11Rik													6.56525	3.45216	2.25117	-0.927351
Ccdc80													41.6465	21.8983	4.91644	-0.927376
Atg2b													7.05048	3.70658	2.35391	-0.927633
Col5a2													193.294	101.616	7.13082	-0.927669
Osr1													24.3766	12.8121	4.14343	-0.92799
Ubr5													38.0551	19.9951	4.7858	-0.928443
Ift140													7.15713	3.75987	2.37503	-0.928698
Farp1													23.2353	12.2025	4.07368	-0.929142
Ncoa3													5.90979	3.10261	2.09829	-0.929625
Mink1													5.79415	3.04036	2.06942	-0.930355
Tacc2													7.09384	3.71917	2.36077	-0.931586
Foxc1													9.64676	5.053	2.80359	-0.932904
Kank2													13.2588	6.94357	3.26228	-0.933201
Gnaq													14.5554	7.62243	3.39687	-0.933232
Tulp4													31.4952	16.4901	4.51029	-0.933532
Fgfr1													60.6255	31.733	5.45488	-0.933941
Zfp516													6.60728	3.45481	2.25633	-0.93545
Pmp22													93.8033	49.0337	6.08363	-0.935865
Rps6ka2													12.2215	6.38324	3.14282	-0.937061
Myo1e													12.6731	6.61139	3.19433	-0.938744
Zfp827													6.79031	3.54113	2.29384	-0.939268
Antxr1													12.5858	6.56259	3.184	-0.93946
Arhgap28													12.0163	6.26475	3.11709	-0.939664
Bmpr2													11.9111	6.20908	3.10431	-0.939855
Ubr2													14.2092	7.40581	3.35871	-0.940096
Hip1													10.374	5.40046	2.90399	-0.941818
Rara													9.00967	4.67586	2.69835	-0.946243
Chd4													41.5314	21.5484	4.90282	-0.946622
Iqgap1													40.6368	21.0718	4.87098	-0.947473
Flna													264.433	137.013	7.57246	-0.948589
Fam117b													7.72106	4.00009	2.47442	-0.948766
Magi1													5.52267	2.85982	1.99065	-0.949442
Spata13													3.45012	1.7842	1.31096	-0.951369
Ikzf2													3.47063	1.79467	1.31946	-0.951479
N4bp2													3.62751	1.87461	1.38279	-0.952389
Flii													34.1992	17.6707	4.61959	-0.952603
Chst12													17.2283	8.90184	3.63041	-0.952605
Clcn5													23.5923	12.1899	4.08393	-0.95263
Usp9x													78.9792	40.805	5.82704	-0.952727
Frmd4a													6.87812	3.55243	2.30541	-0.953208
Trip11													3.62676	1.87159	1.38147	-0.954417
Nid1													48.9133	25.2042	5.13387	-0.956563
Ralgds													17.4103	8.96747	3.64329	-0.957168
Rxra													16.5398	8.51865	3.56925	-0.957245
Prdm2													7.87245	4.0543	2.49813	-0.95736
Tbc1d5													10.1477	5.22468	2.86421	-0.957738
Heatr5a													10.0873	5.19351	2.85559	-0.957758
Eprs													101.732	52.3264	6.18905	-0.959163
Abhd4													18.377	9.45145	3.72018	-0.959294
Cep170b													2.50855	1.28981	0.847006	-0.959695
Dock1													13.2141	6.79284	3.24401	-0.959991
Egfr													7.99988	4.11005	2.51957	-0.960822
Arap1													12.6272	6.48256	3.17751	-0.961899
Mdc1													10.6041	5.44172	2.92531	-0.962488
Ralgapa1													7.22239	3.70567	2.37111	-0.962742
Gtf3c1													11.9872	6.14794	3.10176	-0.96332
Fam160b1													8.50737	4.36084	2.60666	-0.964107
Chst14													12.6626	6.4837	3.17966	-0.965684
Abca5													10.6091	5.42794	2.92382	-0.966826
Nup188													18.215	9.31504	3.70331	-0.967493
Bcor													5.33903	2.73016	1.93278	-0.967592
Celf2													17.8924	9.14762	3.67734	-0.967879
Fads2													171.605	87.6771	6.93854	-0.96882
Synrg													4.6599	2.38084	1.73588	-0.968828
Setd5													23.5157	12.0107	4.0709	-0.969304
Tacc1													6.08562	3.10822	2.12075	-0.969316
Zswim8													16.9096	8.63287	3.59481	-0.96993
Cblb													2.71682	1.38695	0.956917	-0.970003
Pik3r4													4.89981	2.50113	1.80765	-0.970146
Zmat3													4.56601	2.33004	1.70564	-0.970579
Atp11a													16.1675	8.24068	3.52889	-0.972261
Rfx7													9.66282	4.92361	2.78608	-0.972728
Ulk2													7.06598	3.59781	2.334	-0.973771
Hipk1													17.4963	8.9076	3.64201	-0.973941
Col16a1													10.2029	5.19245	2.86366	-0.974492
Bhlhe41													3.1606	1.60762	1.17256	-0.975272
Acly													224.269	114.044	7.32127	-0.97564
Col3a1													102.717	52.2054	6.19433	-0.976404
Myo5a													21.487	10.8939	3.93542	-0.979944
Setx													16.9736	8.604	3.59511	-0.980213
Hunk													3.40963	1.72786	1.2793	-0.980629
Megf9													7.50846	3.80362	2.41795	-0.981144
Ablim1													13.4955	6.83637	3.26382	-0.981176
Fam168a													7.959	4.03153	2.50196	-0.98126
Lnpep													38.1714	19.3303	4.76361	-0.981628
Zfp318													5.08495	2.5744	1.85523	-0.981997
Herc1													5.09838	2.5788	1.85837	-0.983339
Thbs1													150.01	75.8025	6.73654	-0.984741
Cpd													19.4654	9.82082	3.78934	-0.986997
Cat													34.3292	17.3173	4.60775	-0.987222
Spry1													5.04301	2.5436	1.84058	-0.987413
Hivep2													5.00357	2.52261	1.82894	-0.988041
Sec31a													72.8102	36.6864	5.69162	-0.988895
Acsf2													4.43479	2.23222	1.65367	-0.990387
Tle3													8.19604	4.12091	2.53894	-0.991964
9930021J03Rik													6.57442	3.3047	2.22069	-0.992344
Arhgef10													17.1494	8.61802	3.60372	-0.99273
Emilin2													3.76383	1.89124	1.41577	-0.992869
Ap3d1													25.4291	12.7699	4.17154	-0.993733
Pck2													46.2688	23.229	5.03491	-0.994113
Prpf8													60.3831	30.2851	5.4183	-0.995537
Pkd2													30.4928	15.2893	4.43242	-0.995946
Dnmbp													6.32341	3.16161	2.16068	-1.00004
Tcf4													14.302	7.15072	3.33812	-1.00006
Tnrc6a													6.05276	3.02444	2.09713	-1.00093
Cramp1l													4.56727	2.28183	1.69076	-1.00114
Ski													26.8324	13.4042	4.24526	-1.00129
Elovl6													59.1847	29.5502	5.38612	-1.00206
Vps13a													15.6038	7.78671	3.46242	-1.00281
Itgbl1													32.1302	16.0337	4.50445	-1.00282
Wwc1													6.95499	3.46918	2.29632	-1.00345
Cep164													3.44764	1.71947	1.28379	-1.00365
Kif1b													26.0094	12.9697	4.19902	-1.00389
Setd7													16.2992	8.12576	3.52462	-1.00423
Ralgapb													15.4265	7.68282	3.44449	-1.0057
Zyx													138.843	69.1353	6.61433	-1.00596
Med13													17.1533	8.54076	3.59739	-1.00605
Pbxip1													7.37842	3.67066	2.37968	-1.00727
Ccser2													14.8008	7.36135	3.38379	-1.00763
Ssh1													4.11071	2.04284	1.53498	-1.00881
Pcdh18													43.5884	21.6581	4.94135	-1.00904
Pear1													5.14659	2.5561	1.85878	-1.00967
Sash1													7.08617	3.51768	2.31982	-1.01038
Col4a5													31.3926	15.5818	4.46707	-1.01056
Aspm													16.8467	8.3567	3.56866	-1.01146
Hlf													2.33331	1.15727	0.716552	-1.01165
Adamts5													26.3139	13.0471	4.21171	-1.0121
Phc1													8.10247	4.01636	2.51213	-1.01247
Fndc3b													21.0608	10.4201	3.88889	-1.01519
Rad54l2													4.21781	2.08643	1.56877	-1.01546
Elk4													10.4767	5.1821	2.88132	-1.01558
Kdm4a													23.2551	11.4984	4.03142	-1.01611
Mki67													41.1033	20.3217	4.85307	-1.01623
Gxylt2													15.1915	7.5021	3.41624	-1.0179
Prkdc													4.10895	2.02586	1.52865	-1.02024
Sall2													3.46167	1.70665	1.28132	-1.0203
Marcks													177.492	87.323	6.95995	-1.02332
Madd													2.26162	1.11264	0.665672	-1.02337
Sertad2													18.696	9.1969	3.7129	-1.02351
Lrrk1													8.31132	4.08761	2.54317	-1.02382
Ncor1													26.3357	12.9465	4.20672	-1.02446
Pcdh19													15.3021	7.51872	3.42307	-1.02517
Rapgef2													8.72733	4.28119	2.61178	-1.02753
Slc7a2													14.8419	7.27823	3.3776	-1.02802
Dab2													10.3476	5.06797	2.85632	-1.02982
Smarcc2													18.2638	8.93977	3.67558	-1.03068
Sel1l													18.6025	9.10102	3.70173	-1.0314
Samd4b													7.34187	3.59058	2.36018	-1.03193
Eif2c1													6.98798	3.41672	2.28874	-1.03226
Maf													8.64055	4.22457	2.59496	-1.03232
Sos1													13.5489	6.62229	3.24372	-1.03277
Ldlr													98.0666	47.8768	6.09847	-1.03444
Myo1d													7.41492	3.61966	2.37314	-1.03458
Mga													11.7134	5.71643	3.0326	-1.03497
Ulk1													5.03927	2.45916	1.81569	-1.03505
Wdtc1													5.80013	2.82857	2.01808	-1.03601
Klhl24													14.6416	7.13756	3.35372	-1.03657
Baz2b													3.6186	1.76275	1.33663	-1.0376
C1rb													12.783	6.22633	3.15727	-1.03777
Mllt4													25.2159	12.2732	4.13685	-1.03882
Mast3													5.5374	2.69452	1.94962	-1.03918
2310067B10Rik													5.16011	2.50961	1.84743	-1.03994
Pacs2													3.93488	1.91228	1.45581	-1.04103
Sec24b													12.2004	5.92758	3.08815	-1.04141
Clstn1													58.2287	28.2679	5.34238	-1.04257
Gcn1l1													15.6611	7.59813	3.44738	-1.04347
Lrrc32													2.77732	1.34674	0.951582	-1.04422
Fam222b													3.66305	1.77512	1.35048	-1.04513
Dennd4a													11.3196	5.48213	2.97774	-1.04601
Ano6													27.6764	13.3933	4.26701	-1.04714
Sort1													1.71799	0.831361	0.257134	-1.04717
Dzip1													8.64929	4.18437	2.5888	-1.04757
Bcr													10.0851	4.87243	2.8094	-1.04951
Sepn1													18.4617	8.91441	3.6813	-1.05032
Zc3h7b													18.589	8.9757	3.6912	-1.05035
Eya1													3.2697	1.57838	1.1838	-1.05071
Nin													2.76258	1.33266	0.940162	-1.05171
Micall2													15.5186	7.48214	3.42969	-1.05248
Dock7													20.0371	9.6582	3.79818	-1.05285
Itfg3													18.9074	9.10842	3.71404	-1.05368
Myadm													65.9431	31.7459	5.51582	-1.05465
Psd3													2.89708	1.39441	1.00713	-1.05494
Mtor													6.56195	3.15815	2.1866	-1.05504
Sesn2													10.7826	5.1883	2.90295	-1.05537
Polr2a													12.5398	6.03306	3.12067	-1.05555
Arhgef12													13.3297	6.41248	3.20873	-1.05569
Man2b2													9.66504	4.64588	2.74436	-1.05682
Irgq													2.20781	1.06041	0.613619	-1.05799
Arfgef2													10.3614	4.97631	2.84411	-1.05807
Larp1													37.7689	18.1364	4.70997	-1.05831
Tiam1													8.6804	4.16542	2.58811	-1.0593
Gpr124													20.7785	9.96657	3.84706	-1.05992
Shroom4													3.04862	1.46133	1.07772	-1.06087
Numbl													9.05072	4.33225	2.64657	-1.06292
Pde4a													2.2861	1.09403	0.66127	-1.06324
Cul7													36.5834	17.5046	4.66139	-1.06346
Ecm1													25.5557	12.2213	4.14345	-1.06425
Epg5													3.73685	1.78667	1.36955	-1.06455
D930015E06Rik													5.22737	2.49677	1.85307	-1.06602
Atf7													5.55513	2.65277	1.94066	-1.06632
Mbd5													2.78635	1.33004	0.944923	-1.06691
Trak1													5.35453	2.55542	1.88716	-1.0672
Ehd3													2.93003	1.39782	1.01705	-1.06774
Amotl1													13.2173	6.30186	3.19007	-1.06858
Itpr3													12.7172	6.06192	3.13424	-1.06893
Foxn3													8.00154	3.81332	2.46566	-1.06923
Pak3													29.6029	14.0995	4.35262	-1.07009
Gsk3b													16.4369	7.82745	3.5037	-1.07032
Hk1													20.8458	9.92169	3.84614	-1.0711
Nbas													7.31	3.47701	2.33386	-1.07202
Lgr4													5.37508	2.55552	1.88995	-1.07267
Atrn													9.87718	4.695	2.76761	-1.07297
Pcdhgc3													43.0242	20.4385	4.89015	-1.07386
Dpysl2													85.3729	40.5485	5.87864	-1.07413
Cachd1													4.0067	1.90203	1.46498	-1.07487
Supt6													13.7948	6.54596	3.24833	-1.07545
Snrnp200													43.4701	20.6218	4.90402	-1.07585
Nbeal1													8.44797	4.00553	2.5403	-1.07661
Eya4													22.5674	10.6972	3.95766	-1.07701
Fam65a													4.28767	2.03154	1.56138	-1.07762
Slc38a1													14.7748	6.99955	3.34616	-1.0778
Pcnx													2.86467	1.35667	0.979219	-1.0783
Qser1													12.5966	5.96523	3.11577	-1.07838
Atg9a													11.1645	5.28614	2.94153	-1.07863
Erc1													7.19401	3.40193	2.30657	-1.08044
Myo9a													13.9804	6.60819	3.26479	-1.08108
Plcb4													7.75448	3.66455	2.41433	-1.08139
Fam193a													8.70965	4.11324	2.58144	-1.08234
Ankrd17													25.7844	12.173	4.14702	-1.08281
Lrp6													12.4551	5.87944	3.09717	-1.08299
Calcrl													2.24122	1.05681	0.622	-1.08457
Zfp369													6.21696	2.93106	2.09382	-1.08479
Tgfbr3													28.3211	13.3511	4.28135	-1.08492
Fam63b													2.30808	1.08753	0.663874	-1.08564
Fyco1													2.30585	1.08634	0.662387	-1.08582
Gpc4													52.5498	24.7507	5.17251	-1.08622
Tspan7													27.9597	13.1609	4.26173	-1.08709
Slc1a4													22.1883	10.4383	3.92777	-1.08791
Ccdc141													5.26874	2.47785	1.85327	-1.08837
Med25													9.58738	4.50235	2.71591	-1.09046
Ankrd52													7.56688	3.54497	2.37274	-1.09393
Zkscan8													5.8546	2.74184	2.00236	-1.09443
Sema3c													30.2723	14.1719	4.37244	-1.09497
Aph1b													10.0935	4.7247	2.78779	-1.09513
Trappc9													10.7909	5.0501	2.88403	-1.09543
Sfmbt2													2.93901	1.37534	1.00756	-1.09554
Zc3h4													5.67558	2.65524	1.95681	-1.09593
Magi3													12.7126	5.94535	3.11997	-1.09643
Dnajc16													6.47447	3.02749	2.14644	-1.09664
Grn													100.671	47.0401	6.10466	-1.09769
Rfx1													3.277	1.53	1.16295	-1.09884
Mlxip													4.09348	1.90778	1.48261	-1.10143
Gpatch8													5.74166	2.6753	1.97058	-1.10177
Caskin2													3.3969	1.58214	1.21305	-1.10234
Prrc1													4.26705	1.98694	1.54189	-1.10269
Ece1													22.0554	10.2637	3.91127	-1.10358
Zzef1													5.25452	2.44362	1.84129	-1.10454
Plekhg2													1.99945	0.929836	0.447326	-1.10456
Plag1													3.96756	1.84493	1.43591	-1.10469
Polr1a													38.3205	17.8102	4.70734	-1.10541
Mef2c													1.75197	0.813926	0.255974	-1.10601
Tmem131													9.29004	4.31017	2.66171	-1.10794
Lamb2													23.7903	11.0304	4.01786	-1.10889
Arid2													8.75568	4.05613	2.57516	-1.11012
Cgnl1													4.42561	2.04958	1.5906	-1.11055
Ndrg4													5.74899	2.65951	1.96723	-1.11215
Dclk1													67.0699	31.0149	5.51124	-1.1127
Ctnnd1													51.8911	23.9859	5.14076	-1.1133
Unc13c													1.63912	0.757006	0.155649	-1.11454
Smg1													16.2154	7.48072	3.46123	-1.11612
Sbf2													8.41236	3.8806	2.5144	-1.11623
Sptan1													52.7122	24.3135	5.16188	-1.11638
Cc2d2a													8.76954	4.04426	2.57419	-1.11663
Scn2a1													1.22421	0.564204	-0.26693	-1.11756
Ddr2													54.6555	25.184	5.21337	-1.11786
Ints1													14.9853	6.90245	3.34629	-1.11837
Mef2d													6.6754	3.0729	2.17923	-1.11925
Chd2													4.83103	2.22346	1.71257	-1.11952
Kif13a													4.02813	1.85282	1.44992	-1.12039
Lmo7													17.4501	8.02136	3.56451	-1.12132
Gramd1b													5.30205	2.43521	1.8453	-1.1225
Sh3pxd2a													14.983	6.87793	3.34361	-1.12328
Wiz													5.38959	2.47363	1.8684	-1.12355
Plxna3													5.24181	2.40535	1.82816	-1.12382
Mov10													14.8382	6.80739	3.32917	-1.12414
Man2a2													7.64642	3.50624	2.37235	-1.12486
Ndst1													10.5278	4.82343	2.8331	-1.12607
Mfsd4													4.24372	1.94364	1.52205	-1.12657
Hectd1													20.5742	9.42234	3.79942	-1.12668
Amotl2													75.8847	34.6911	5.68112	-1.12924
Srgap2													6.81885	3.11596	2.2046	-1.12985
Tmem2													8.7946	4.01408	2.57084	-1.13155
Dysf													4.32413	1.97289	1.54636	-1.1321
Adam23													4.91532	2.24167	1.73093	-1.13271
Mtus1													2.80658	1.27967	0.922293	-1.13304
Tnks1bp1													20.3574	9.27576	3.78047	-1.13402
Acot2													6.80813	3.10134	2.20008	-1.13437
Rprd2													5.83477	2.6577	1.97743	-1.1345
Arhgap31													4.36039	1.98506	1.55682	-1.13527
9830001H06Rik													1.60336	0.729598	0.113136	-1.13592
Pde8b													14.0364	6.38713	3.24313	-1.13593
Tjp1													14.3363	6.52356	3.27363	-1.13594
Zdhhc9													11.3884	5.18067	2.94132	-1.13635
Zcchc14													12.8774	5.85729	3.1185	-1.13654
Dhcr24													87.3889	39.7033	5.88028	-1.13819
Aldh6a1													4.59406	2.08698	1.63059	-1.13835
Tnks													20.6722	9.38283	3.79982	-1.1396
Vps13b													7.10369	3.22015	2.25785	-1.14144
Myo6													3.33361	1.51067	1.16614	-1.1419
Uhrf1bp1													9.74674	4.41665	2.71394	-1.14197
Zfp36l1													23.5052	10.6489	3.98377	-1.14228
Inf2													4.05445	1.83611	1.44808	-1.14285
Tnc													29.3222	13.251	4.30098	-1.14589
Epb4.1													4.59782	2.07685	1.62767	-1.14655
Dab2ip													3.8974	1.75898	1.38863	-1.14777
Phc3													5.31063	2.3954	1.83457	-1.14862
Rnf44													6.79585	3.06418	2.19008	-1.14915
Mid1													3.50098	1.57838	1.2331	-1.14931
Dock5													6.79566	3.0631	2.1898	-1.14962
Wdr19													5.42326	2.44374	1.86413	-1.15007
Ptprs													63.0459	28.4065	5.40324	-1.15018
Plekhg5													4.43048	1.99602	1.57229	-1.15034
Ar													3.48892	1.56967	1.22662	-1.15232
Phf15													5.05032	2.27085	1.7598	-1.15314
1700017B05Rik													6.99129	3.14128	2.22846	-1.15421
Col6a3													1.39457	0.625139	-0.0989654	-1.15757
Greb1l													1.8148	0.813418	0.28094	-1.15774
Wfs1													4.63803	2.07728	1.6341	-1.15882
Cog7													3.787	1.6961	1.34164	-1.15883
Glg1													39.6104	17.7176	4.72746	-1.1607
Ash1l													11.2592	5.03266	2.91218	-1.16171
Bag3													7.54576	3.37255	2.33475	-1.16183
Tanc1													10.1585	4.54021	2.76369	-1.16186
Kif26b													3.58793	1.60343	1.26216	-1.16199
Neo1													31.8241	14.2026	4.41007	-1.16396
Foxj2													4.53846	2.02317	1.59941	-1.16559
Ube4b													33.5015	14.9145	4.4824	-1.16751
Hdac4													5.1242	2.28084	1.77345	-1.16776
Ptprf													5.76344	2.56191	1.94207	-1.16971
Lifr													16.8914	7.50464	3.493	-1.17043
Ebf1													20.0896	8.91963	3.74268	-1.17139
Mdn1													6.67201	2.95611	2.15091	-1.17442
R3hdm2													7.65735	3.38865	2.34878	-1.17613
Nphp3													2.72187	1.2042	0.856337	-1.17652
Mapkbp1													2.52996	1.1189	0.750598	-1.17703
Dip2c													7.03228	3.10836	2.22507	-1.17784
Cbl													7.13546	3.1521	2.24566	-1.17869
Map4													31.7463	14.0092	4.39841	-1.18021
Dnm1													8.45157	3.72719	2.48865	-1.18113
Acss2													32.7403	14.4287	4.44193	-1.18213
Zbtb4													1.25302	0.5522	-0.265664	-1.18215
Plxnb2													36.6227	16.1356	4.60342	-1.18249
Klf3													13.3644	5.88311	3.14845	-1.18374
Trps1													8.33088	3.66331	2.46581	-1.18532
Kirrel													28.5985	12.5713	4.24496	-1.18581
Il1rn													55.239	24.2652	5.19422	-1.1868
Ksr1													3.36165	1.4766	1.15572	-1.18689
Myof													65.5628	28.7948	5.44127	-1.18707
Crocc													1.21762	0.534434	-0.309926	-1.18798
Pcyt1b													16.7128	7.33367	3.46871	-1.18835
Amer1													2.74633	1.204	0.86267	-1.18967
Ubn2													3.83431	1.67926	1.3434	-1.19114
Gbf1													12.8348	5.62045	3.08634	-1.1913
Sema3f													17.1385	7.50117	3.50314	-1.19205
Smad3													16.3672	7.15728	3.43607	-1.19332
Pxdn													15.6614	6.84356	3.37194	-1.19439
Zc3hav1l													4.05497	1.77153	1.42234	-1.1947
Cobll1													7.93212	3.46416	2.39011	-1.1952
Chd9													6.43229	2.80574	2.08686	-1.19695
Rasgrp3													5.42487	2.36613	1.84106	-1.19706
Scaf1													6.11943	2.66889	2.01482	-1.19716
Smarca4													23.954	10.4444	3.98343	-1.19754
Atp6v0a1													14.7845	6.43964	3.2865	-1.19903
Clasp1													12.2486	5.3338	3.01485	-1.19938
Kat6a													12.968	5.64654	3.09713	-1.19952
Cmip													8.96226	3.89899	2.56348	-1.20076
Dennd1a													3.68732	1.60398	1.28211	-1.20092
Htt													7.9748	3.46648	2.39446	-1.20198
Wipf2													1.95606	0.849909	0.366665	-1.20257
Tns3													19.5768	8.50096	3.68935	-1.20345
Rbms3													12.7048	5.50471	3.06398	-1.20664
Tpcn1													3.4145	1.47809	1.1677	-1.20794
Prr14													8.55544	3.70353	2.49287	-1.20794
Itgb8													2.7555	1.19219	0.857964	-1.2087
Efnb1													13.7201	5.93444	3.17367	-1.20911
Trim30d													2.26479	0.979173	0.574506	-1.20974
Timp3													67.2692	29.0409	5.46594	-1.21186
Slc12a2													35.0949	15.1446	4.52696	-1.21246
Kif21a													4.77694	2.06019	1.64943	-1.21331
2900026A02Rik													3.53104	1.51809	1.21118	-1.21784
Fam160a1													5.17842	2.22319	1.76257	-1.21988
Braf													10.8357	4.64987	2.82746	-1.22053
Fmn1													2.2439	0.962733	0.555608	-1.2208
Runx3													4.36112	1.87067	1.51413	-1.22114
Ptprg													8.13691	3.48817	2.41348	-1.22201
Itpr1													7.67274	3.28562	2.32795	-1.22358
Lphn2													13.4022	5.73302	3.13185	-1.2251
Bbx													22.299	9.53453	3.86603	-1.22575
Igsf3													3.93309	1.68058	1.36231	-1.2267
Nisch													30.6951	13.0953	4.32546	-1.22896
Bmf													1.27295	0.542692	-0.266809	-1.22997
Dlg5													10.3903	4.42852	2.762	-1.23034
Ncoa1													2.98157	1.27049	0.960729	-1.23069
Tcp11l2													2.36594	1.00635	0.625773	-1.23328
Col1a2													659.856	280.591	8.74917	-1.23368
Dync2h1													1.99592	0.848701	0.380191	-1.23373
Fgfr2													12.7296	5.40315	3.05196	-1.23631
Igf2													27.6509	11.7298	4.17068	-1.23715
Col6a2													57.7687	24.5018	5.23352	-1.2374
Kidins220													14.7107	6.23775	3.25991	-1.23777
Ubap2													10.446	4.42669	2.76555	-1.23865
Nrp2													41.6203	17.6355	4.75981	-1.2388
Lyst													6.7414	2.85586	2.13349	-1.23912
Unc5c													6.27591	2.65822	2.03014	-1.23936
Ino80d													4.06165	1.72016	1.4023	-1.23952
Smpd3													3.76755	1.59543	1.29379	-1.23968
Rassf2													5.3934	2.28148	1.81058	-1.24123
Dusp18													3.71518	1.57128	1.27269	-1.24149
Mpdz													18.6795	7.9	3.60262	-1.24153
Gm13375													5.33006	2.25332	1.7931	-1.2421
Cdh13													36.7413	15.5243	4.57789	-1.24287
Klf13													7.04188	2.96802	2.19273	-1.24646
Ankrd44													1.40683	0.592547	-0.131275	-1.24745
4930470H14Rik													7.16852	3.01575	2.2171	-1.24916
Gdpd2													2.10579	0.885313	0.449311	-1.2501
Wasf2													11.5664	4.85875	2.90623	-1.25128
C2cd3													2.52803	1.06184	0.71229	-1.25145
Tecpr1													3.45827	1.45241	1.16425	-1.2516
Pi4ka													17.4103	7.30809	3.49568	-1.25237
Ubc													52.388	21.9856	5.08483	-1.25268
Wbp7													1.8562	0.778491	0.265552	-1.2536
Plekhh2													10.9778	4.60224	2.82943	-1.25418
Fam20a													4.98532	2.089	1.69025	-1.25487
Pag1													3.4698	1.45362	1.16725	-1.2552
Pou2f1													2.45274	1.02698	0.666401	-1.25599
Cdc42ep1													26.4514	11.0742	4.0972	-1.25614
Tiam2													9.52655	3.98831	2.62387	-1.25618
Mcc													11.8814	4.95019	2.93906	-1.26315
Zfp592													3.30236	1.37313	1.09048	-1.26603
Dyrk1b													1.41781	0.589497	-0.12939	-1.26611
Gpnmb													19.0147	7.8964	3.61512	-1.26785
Zfp521													12.645	5.24595	3.02585	-1.26929
Garem													2.71208	1.12507	0.804707	-1.26938
Rb1													11.1371	4.61889	2.84242	-1.26976
2410089E03Rik													8.36787	3.46338	2.42852	-1.27268
Atxn2													9.25022	3.81567	2.57071	-1.27755
Col5a1													27.5033	11.3436	4.14267	-1.27773
Cd74													8.67062	3.57602	2.47724	-1.27778
Gm4759													4.50748	1.85845	1.53321	-1.27822
Cx3cl1													10.7556	4.43051	2.78724	-1.27954
Pknox2													2.71991	1.11938	0.803129	-1.28086
Insr													5.67669	2.33562	1.86443	-1.28124
Megf8													4.6081	1.89446	1.56298	-1.28239
4932438A13Rik													6.51906	2.67406	2.06185	-1.28563
Myh10													20.5148	8.41436	3.71572	-1.28574
Dennd3													1.50574	0.61756	-0.0524381	-1.28582
Slc6a6													33.3817	13.6558	4.41621	-1.28954
Birc6													32.2231	13.1817	4.36524	-1.28956
Hcn1													3.86109	1.5788	1.30392	-1.29018
Mn1													4.19188	1.71364	1.42233	-1.29053
Slc7a1													20.046	8.19465	3.67996	-1.29056
Trio													13.8827	5.67433	3.14983	-1.29077
Sh3d19													30.2221	12.3414	4.27148	-1.2921
Asap1													23.503	9.59386	3.90844	-1.29266
Mxd4													30.5687	12.4637	4.28682	-1.29432
Pcnt													3.36175	1.37024	1.10182	-1.29478
Fbxl20													2.95103	1.20249	0.913622	-1.29519
Arhgef11													5.96473	2.42444	1.92705	-1.29881
Ephb3													8.68116	3.52626	2.46801	-1.29975
Tet2													2.10603	0.855431	0.424625	-1.2998
Nsd1													1.9576	0.794742	0.318822	-1.30053
Lrch1													3.84484	1.55966	1.29208	-1.30169
9430020K01Rik													8.74368	3.54612	2.47724	-1.302
Fbrs													3.43259	1.39192	1.12819	-1.30222
Chst15													2.95733	1.19859	0.912817	-1.30296
Kdm6b													1.28414	0.520087	-0.291186	-1.30398
Golga4													4.63785	1.87687	1.56089	-1.30513
Setbp1													1.72221	0.696721	0.131457	-1.30561
Dhrs9													18.4924	7.47144	3.55512	-1.30747
Sap130													5.79825	2.34159	1.88155	-1.30813
Cit													3.3148	1.33837	1.0747	-1.30844
Arhgap21													14.8999	6.00666	3.2419	-1.31067
Brd4													11.7323	4.71893	2.89544	-1.31395
Eif2c2													13.6299	5.47951	3.11137	-1.31466
Lphn1													6.55834	2.6362	2.0559	-1.31487
Sesn3													12.7235	5.11186	3.01164	-1.31558
Dag1													41.9199	16.8357	4.73151	-1.31611
Ptpn14													8.24196	3.30752	2.38437	-1.31724
Srgap3													4.0583	1.62508	1.36069	-1.32036
Aldh1l2													46.5467	18.632	4.88016	-1.3209
Tgfb2													6.00408	2.4009	1.92476	-1.32237
Gab1													7.51451	3.00437	2.24837	-1.32262
Arid1b													6.73301	2.6889	2.08913	-1.32424
Zfhx4													11.0856	4.42656	2.8084	-1.32443
Nfatc1													0.7237	0.288605	-1.12968	-1.3263
Tle2													2.17286	0.865978	0.455999	-1.32719
Chd3													13.3184	5.30752	3.07169	-1.32731
Phf2													5.0986	2.02864	1.68531	-1.32959
Chd6													4.1526	1.65011	1.38829	-1.33145
Mrgprf													9.4258	3.74411	2.57062	-1.33199
Itpr2													1.89841	0.753877	0.258596	-1.33239
Nfib													39.5183	15.6673	4.63707	-1.33476
Npr3													15.1187	5.9916	3.2506	-1.33532
Slc5a3													30.0749	11.9114	4.24238	-1.33622
Irs2													9.21544	3.64754	2.53549	-1.33713
Nfic													12.0826	4.78069	2.92604	-1.33764
Zmiz2													4.0199	1.5903	1.33823	-1.33786
Ep400													9.79681	3.86953	2.62224	-1.34015
Disp1													3.36419	1.32873	1.08015	-1.34021
Nlgn2													5.07446	2.00388	1.67303	-1.34046
Dagla													1.54333	0.609284	-0.0443833	-1.34086
Pitpnm2													1.49	0.587337	-0.0962136	-1.34305
Deptor													4.2409	1.67116	1.41261	-1.34352
Kdm5b													6.23093	2.45492	1.96756	-1.34377
Nbea													5.35483	2.10872	1.7486	-1.34447
Tenc1													4.92349	1.93736	1.62689	-1.34559
Gata3													1.29109	0.507168	-0.305437	-1.34805
Gpc6													14.6808	5.75602	3.20047	-1.35079
Zdhhc8													10.5027	4.11781	2.71728	-1.35081
Col6a1													103.628	40.5881	6.01913	-1.35229
Tlr3													8.30477	3.25222	2.37768	-1.35252
Islr													13.0042	5.09245	3.02463	-1.35255
Gaa													54.0164	21.1225	5.07802	-1.35462
Med13l													12.7716	4.97665	2.99502	-1.35969
Clu													10.5143	4.09579	2.71421	-1.36014
Sorbs3													16.8872	6.57721	3.39767	-1.36038
Cplx2													2.85613	1.11043	0.83259	-1.36294
D8Ertd82e													2.88546	1.12078	0.846652	-1.3643
Abca2													4.96324	1.92674	1.62872	-1.36512
Agap2													1.05964	0.4112	-0.599257	-1.36566
Gnao1													11.3833	4.40463	2.82393	-1.36983
Nup214													6.30689	2.43821	1.97138	-1.37111
Dock9													9.62577	3.72008	2.58112	-1.37157
Ptpn13													5.78046	2.23279	1.84502	-1.37234
Atxn2l													14.9692	5.77884	3.21735	-1.37315
Akap9													2.33571	0.901563	0.537181	-1.37336
Slc35f1													1.36019	0.524689	-0.243329	-1.37427
Slit2													58.4319	22.5206	5.18093	-1.37551
Atxn1													3.7213	1.43341	1.20763	-1.37636
Cped1													10.2273	3.93762	2.66584	-1.37703
Runx2													8.38087	3.22569	2.37835	-1.37749
Apc													8.03703	3.09087	2.31734	-1.37865
Jup													4.75323	1.82762	1.55944	-1.37894
Fam214a													1.17013	0.449646	-0.463235	-1.37981
Ogn									48.2001	18.9591	4.91789	-1.34615	67.398	25.8387	5.38305	-1.38317
Adamts12													2.51075	0.962297	0.636336	-1.38356
Plekha7													0.95995	0.367878	-0.750835	-1.38373
Bcas3													2.99156	1.14624	0.888904	-1.38399
Trp53inp2													8.86832	3.39301	2.45561	-1.3861
Fbrsl1													0.983427	0.37581	-0.718017	-1.38781
Cryab									25.3585	10.5038	4.02862	-1.27156	22.671	8.65896	3.80848	-1.38858
Ncoa2													6.61034	2.52361	2.03011	-1.38924
Myo10													12.3066	4.69732	2.9266	-1.38952
Igf2r													20.8673	7.95674	3.68767	-1.39099
Rusc2													3.45076	1.3126	1.08967	-1.39449
Ylpm1													5.09326	1.937	1.65121	-1.39477
Pik3r1													20.4014	7.75849	3.65319	-1.39482
Cspg4													3.67442	1.39554	1.17917	-1.39669
Nacc2													4.86436	1.847	1.58372	-1.39707
Atp8a1													1.35546	0.514633	-0.259801	-1.39717
Adamts1													151.277	57.4232	6.54231	-1.39749
Runx1t1													5.70338	2.16406	1.81278	-1.39808
Abca8b													2.41226	0.914881	0.571021	-1.39873
Nf1													16.4729	6.2469	3.34258	-1.39888
Arhgef17													7.26543	2.75207	2.16078	-1.40053
Heatr5b													13.1478	4.97961	3.01639	-1.40072
Bod1l													11.5249	4.36383	2.82614	-1.40109
Ep300													7.85314	2.97329	2.27266	-1.40121
Myo18a													7.12254	2.69635	2.1317	-1.40138
Cep350													3.77116	1.42762	1.21431	-1.4014
Per3													3.0083	1.13824	0.887877	-1.40214
Zfp704													1.19492	0.451927	-0.444462	-1.40275
Macf1													14.2166	5.37558	3.12796	-1.40308
Ttyh3													7.23684	2.73593	2.1537	-1.40333
9930013L23Rik									4.75795	2.08179	1.65408	-1.19252	3.2442	1.22377	0.994598	-1.40653
Gltscr1l													4.47609	1.68677	1.45825	-1.40798
Irs1													19.9571	7.51947	3.61473	-1.4082
C3													87.2908	32.8791	5.74343	-1.40866
Ypel2													1.6512	0.621539	0.0187159	-1.4096
Lrp5													6.52242	2.45454	2.00043	-1.40995
Dvl3													4.75196	1.78566	1.54249	-1.41207
Malat1													238.843	89.7274	7.1937	-1.41244
Rere													6.27899	2.35782	1.94399	-1.41308
Helz													3.64384	1.36773	1.15862	-1.41368
Camk1d													1.34279	0.503523	-0.282318	-1.4151
Wnk1													43.1675	16.1737	4.72373	-1.4163
Nov													3.0183	1.12653	0.882811	-1.42185
Sh3rf2													0.858594	0.320195	-0.931465	-1.42303
Vps13c													6.12624	2.28389	1.90325	-1.42351
Mnt													3.2191	1.19952	0.974557	-1.4242
Mycbp2													9.34147	3.47872	2.5111	-1.42509
Ephx1									6.00592	2.38001	1.91868	-1.33542	7.25249	2.70034	2.14581	-1.42534
Hipk2													6.45108	2.39301	1.97418	-1.43071
Dlc1													11.3723	4.21716	2.79186	-1.43118
Tln1													45.94	17.0324	4.80594	-1.43147
Pdzd2													0.816475	0.302492	-1.00878	-1.43251
Ppp1r3c													2.1102	0.781639	0.360977	-1.43281
Arhgap32													4.19684	1.55345	1.35239	-1.43383
Aff1													10.2367	3.78782	2.63852	-1.43431
Sptbn1													53.1283	19.6559	5.01415	-1.43452
Cacna1b													1.78081	0.658205	0.114571	-1.43592
Ssc5d													1.34461	0.496839	-0.290981	-1.43634
Sh3pxd2b													13.9511	5.14173	3.08228	-1.44005
Bptf													8.38929	3.09127	2.34837	-1.44035
Sox9													19.2436	7.08216	3.54525	-1.44212
Setd1a													5.08993	1.87219	1.62619	-1.44292
Vps13d													3.97383	1.46101	1.26875	-1.44356
Apbb2													27.2119	9.97046	4.04191	-1.44851
Vdr													7.92188	2.90208	2.26147	-1.44876
Fzd5													3.85684	1.41234	1.22275	-1.44933
Mtss1													1.26228	0.461988	-0.38902	-1.4501
Igf1r													10.8107	3.95317	2.7087	-1.45138
Atf7ip													11.8336	4.325	2.83876	-1.45212
Col4a6													5.9452	2.17228	1.84547	-1.45252
Lrrn4cl													2.75717	1.00721	0.736776	-1.45282
Cd248													13.9759	5.10452	3.07832	-1.45309
Sh3rf3													4.23224	1.54576	1.35487	-1.45311
Scd1													194.569	71.0362	6.87731	-1.45366
Lama4													25.0416	9.13666	3.91896	-1.45459
Jag1													8.00235	2.91912	2.27298	-1.45489
Aak1													9.28709	3.3861	2.48743	-1.4556
Zfpm1													3.52982	1.28497	1.09066	-1.45786
Kcnj2									27.5608	11.3374	4.14378	-1.28153	28.1072	10.2271	4.0836	-1.45854
Rrbp1													25.1106	9.12451	3.91999	-1.46048
Pdgfra													50.9187	18.4994	4.93977	-1.46072
Atg2a													3.44715	1.24787	1.05244	-1.46594
Lphn3													4.77348	1.72736	1.52181	-1.46647
Prrc2b													14.1712	5.12053	3.09059	-1.4686
Pcnxl3													7.22384	2.60661	2.11747	-1.47059
Col28a1													0.940905	0.339378	-0.823457	-1.47116
Col4a1													55.9172	20.151	5.069	-1.47244
Flnb													67.0139	24.1488	5.33013	-1.47251
Ptpn23													5.31728	1.91494	1.67399	-1.47339
Man1c1													3.44161	1.238	1.04555	-1.47507
Sik1									16.1959	7.70413	3.48159	-1.07192	16.1115	5.78789	3.27153	-1.47698
Zmynd8													18.3739	6.59043	3.45998	-1.47921
Paqr8													4.47308	1.60396	1.42145	-1.47963
Pld1													1.76864	0.631734	0.0800148	-1.48525
Mast4													6.40059	2.28277	1.9345	-1.48742
Atn1													5.71502	2.03708	1.77063	-1.48826
Rreb1													1.65596	0.590064	-0.0166944	-1.48872
Calcoco1													7.06419	2.51344	2.07509	-1.49086
Slc29a3													3.86125	1.3708	1.20204	-1.49405
Crtc3													2.30532	0.817203	0.456867	-1.4962
Gpr126													8.08105	2.86433	2.26637	-1.49635
Baz2a													4.49992	1.59238	1.42054	-1.49871
Numa1													13.6962	4.84427	3.02599	-1.49942
Mylk													4.61068	1.62708	1.45363	-1.50269
Ncoa6													7.38888	2.60546	2.13345	-1.50382
Mll3													4.30522	1.51699	1.35365	-1.50488
Adamtsl3													3.58387	1.25474	1.08445	-1.51413
Plxna1													32.213	11.2779	4.2525	-1.51414
Steap4													7.15328	2.50378	2.08136	-1.5145
Zer1													2.89948	1.01464	0.778381	-1.51483
Nfix													38.7916	13.5509	4.51899	-1.51736
Lpp													26.4733	9.2422	3.96735	-1.51823
Tead1													14.622	5.07965	3.1074	-1.52534
Thsd7a													4.07256	1.41385	1.26278	-1.52631
Huwe1													34.2856	11.9002	4.33622	-1.52662
Hcfc1													23.8868	8.26022	3.81216	-1.53196
Scd2													628.104	216.789	8.5275	-1.53471
Abca3													4.74432	1.63617	1.47826	-1.53588
Serpinb8													2.05148	0.707307	0.268537	-1.53626
Amot													16.7025	5.75511	3.29342	-1.53715
Gatsl2													1.46008	0.502354	-0.223588	-1.53927
Cacna1c													4.38551	1.50692	1.36217	-1.54114
Arhgap23													10.0087	3.4361	2.55198	-1.54241
Akap13													4.5089	1.54651	1.4009	-1.54376
Il17rd													1.46134	0.501109	-0.224756	-1.5441
Rgma													5.56108	1.90657	1.70317	-1.54439
Tcf7l2									5.34374	2.30555	1.81148	-1.21274	3.88555	1.33153	1.1856	-1.54503
Zfp462													3.85089	1.31963	1.17266	-1.54506
Synpo													5.71781	1.95896	1.74278	-1.54537
Svil													5.44722	1.86559	1.67258	-1.54589
Afap1													10.2312	3.50324	2.5818	-1.54621
Lamc1													32.6878	11.1925	4.25757	-1.54622
Zfyve26													3.53823	1.20465	1.04582	-1.55441
Jhdm1d													1.18821	0.404164	-0.529099	-1.55578
Syne2													2.58595	0.879013	0.592325	-1.55674
Arid5b													13.2034	4.48083	2.9433	-1.55907
Col4a2													24.5209	8.30565	3.83502	-1.56185
Klf12													2.92221	0.988995	0.765547	-1.56302
Crebbp													11.2066	3.79173	2.70457	-1.56342
Tln2													12.0737	4.07988	2.81116	-1.56527
Notch2													14.5573	4.9185	3.08094	-1.56545
Col12a1													10.9223	3.69029	2.66647	-1.56547
Cep250													2.33391	0.787256	0.438827	-1.56784
Dip2b													10.7899	3.63793	2.64736	-1.56849
Gas6													4.78277	1.60753	1.47135	-1.573
Hivep3													0.680974	0.228679	-1.34147	-1.57428
Myh9													101.151	33.9256	5.87233	-1.57606
Tnrc6b													4.07166	1.36186	1.2356	-1.58004
Herc2													7.60152	2.53838	2.1351	-1.58238
Nfat5													14.9033	4.97258	3.10578	-1.58357
C230081A13Rik													10.2972	3.42556	2.57026	-1.58784
Smoc2													1.9684	0.654502	0.182746	-1.58855
Pdk2													1.31376	0.435315	-0.403083	-1.59357
Prrc2a													36.0066	11.9246	4.37303	-1.59432
Wfdc12													4.36717	1.44543	1.3291	-1.5952
Meg3													2.07592	0.687029	0.256097	-1.59531
Mark4													3.13574	1.03764	0.851056	-1.5955
Epha4													11.7109	3.87036	2.75112	-1.59731
Gm15800													2.032	0.671344	0.224012	-1.59778
Ahnak													152.3	50.2866	6.45144	-1.59867
Aldh1a1													1.60772	0.5304	-0.114916	-1.59986
2410066E13Rik													2.62709	0.866221	0.593136	-1.60066
Adamts9									14.2459	6.47316	3.26347	-1.138	12.6301	4.15387	2.85663	-1.60434
Creb3l2													7.36499	2.411	2.07516	-1.61105
Piezo1													20.8198	6.76616	3.56911	-1.62155
Trerf1													1.98321	0.643685	0.176132	-1.62341
Pkd1													11.7376	3.80653	2.74077	-1.62459
Prrc2c													21.196	6.86947	3.59296	-1.62552
Plxnd1													13.4191	4.33722	2.93149	-1.62945
Tet3													2.75543	0.888724	0.646042	-1.63247
Flnc													34.0872	10.974	4.27359	-1.63514
Mtss1l													5.19598	1.67277	1.55982	-1.63516
Fam53b													3.23917	1.03918	0.875535	-1.64018
Ppargc1a													4.16767	1.33645	1.23882	-1.64084
Sh3tc2													1.02238	0.327769	-0.788659	-1.64118
Ror1													1.48281	0.474617	-0.253415	-1.6435
Maml3													1.56314	0.499339	-0.178731	-1.64636
Acaca													49.0697	15.6564	4.79272	-1.64808
Tanc2													8.1416	2.59529	2.2006	-1.64942
Pdgfrb													35.8282	11.4053	4.33733	-1.65139
Acox2													1.53775	0.489436	-0.204993	-1.65163
Nrk													4.25727	1.35129	1.26213	-1.65559
Boc													0.891021	0.282333	-0.995499	-1.65806
Iqsec1													11.8345	3.7392	2.73383	-1.6622
Hivep1													4.96246	1.5613	1.4769	-1.66831
Trrap													12.4677	3.89987	2.80177	-1.6767
Peg10													2.5505	0.797186	0.511884	-1.67779
Gstm1									37.6036	16.038	4.61811	-1.22938	43.7071	13.585	4.60687	-1.68585
Camta2													1.70143	0.527711	-0.0777161	-1.68893
Mll1													4.01645	1.24398	1.16044	-1.69096
Maml2													6.42676	1.98387	1.8362	-1.69577
Utrn													11.967	3.69333	2.73296	-1.69607
Bahcc1													1.86776	0.576325	0.0531318	-1.69635
Fryl													6.01283	1.84523	1.73592	-1.70424
Arid1a													4.63496	1.42043	1.35944	-1.70623
Plxnb1													2.09943	0.642682	0.216087	-1.70782
Clip3													5.86858	1.79311	1.69774	-1.71055
Gli2													0.983844	0.299487	-0.881467	-1.71594
Med12													7.32101	2.22553	2.0131	-1.71789
Grik5													6.39339	1.94143	1.81685	-1.71946
Aim1									6.80272	3.26486	2.23657	-1.05909	7.96702	2.41706	2.13365	-1.72079
Ankrd11													17.4066	5.2505	3.25701	-1.72911
Abcd1													2.92911	0.881508	0.684254	-1.73242
Bcl9													1.90053	0.569865	0.0575469	-1.73771
Aldh1a7													1.37652	0.412227	-0.408732	-1.73951
Ank2													8.87092	2.65236	2.27818	-1.74181
Nhs													1.04532	0.312343	-0.807426	-1.74274
Aoc3													1.34244	0.399638	-0.449188	-1.74809
AI464131													1.85449	0.550436	0.0148346	-1.75238
Nav1													1.8587	0.55079	0.0169341	-1.75472
Wdfy3													7.75669	2.29764	2.0778	-1.75529
Tep1													1.47936	0.437929	-0.313129	-1.7562
Parp4													1.91353	0.565555	0.0569879	-1.7585
8430408G22Rik					8.9737	2.23621	2.16338	-2.00465	9.08723	2.20476	2.16223	-2.04322	9.64983	2.84745	2.39009	-1.76083
Slc25a23													2.55244	0.751779	0.470129	-1.7635
Sec16a													11.6624	3.43117	2.66125	-1.76509
Srpx2													11.0452	3.24911	2.5827	-1.7653
Golgb1													5.38695	1.58184	1.54554	-1.76786
Cdon													12.9502	3.79475	2.80945	-1.7709
Ltbp4													3.1293	0.914451	0.758409	-1.77486
Kalrn													2.67995	0.781723	0.533468	-1.77748
Tcf7l1									2.34552	0.850954	0.49853	-1.46275	1.94042	0.564359	0.065527	-1.78168
Nav2													1.69856	0.489248	-0.133525	-1.79567
Dhrs3													5.08595	1.46241	1.44743	-1.79817
Cyp26b1													2.41192	0.692141	0.36966	-1.80104
Lpin1													17.2593	4.93507	3.20619	-1.80623
Srrm2													55.2567	15.6711	4.87906	-1.81804
Thrb													1.30522	0.369533	-0.525966	-1.82052
Zfp362													0.682966	0.192585	-1.46327	-1.82632
Col1a1													230.452	64.7788	6.93289	-1.83087
D630045J12Rik													3.38428	0.950505	0.842808	-1.83208
Fn1													255.629	71.7147	7.08105	-1.83371
Foxk1													5.94788	1.66082	1.65214	-1.84048
Sema6a													1.2844	0.35814	-0.560155	-1.8425
Zbtb20													3.92351	1.08907	1.04762	-1.84905
Cacna1g													3.05106	0.845887	0.683924	-1.85077
Slc6a9													14.2231	3.93905	2.90401	-1.85232
Afap1l2													1.68906	0.465745	-0.173084	-1.85861
Daam2													3.69847	1.01973	0.957558	-1.85874
Akna													1.39818	0.384702	-0.447318	-1.86174
Pappa													3.24689	0.888008	0.763852	-1.87041
Trp53inp1									2.88793	1.07399	0.816508	-1.42706	4.30896	1.17263	1.16854	-1.87759
Adamtsl4													3.29926	0.896853	0.782543	-1.8792
Apba1													0.919196	0.24971	-1.06162	-1.88012
Glis1													1.57051	0.4264	-0.289244	-1.88095
Nckap5l													1.61827	0.437014	-0.249898	-1.8887
Cic													15.0791	4.0438	2.9651	-1.89877
Fat1													39.9543	10.6962	4.36965	-1.90125
Cdsn													10.2145	2.73278	2.40146	-1.90218
Dync1h1													33.7101	8.99924	4.12246	-1.90531
Ahdc1													3.82534	1.01508	0.978591	-1.91399
Gm608													3.12309	0.826332	0.683884	-1.91818
Plekha4													1.07026	0.282504	-0.862848	-1.92162
Setd1b					2.13224	0.88796	0.460468	-1.2638					0.720489	0.190164	-1.43382	-1.92173
Phactr1													1.97751	0.515862	0.014371	-1.93863
Itga11													4.85888	1.25507	1.3042	-1.95286
Limch1									6.5403	2.88974	2.12015	-1.17842	8.06111	2.07921	2.03351	-1.95494
Dst													12.3304	3.17551	2.64557	-1.95716
Aff3													5.43515	1.38966	1.45853	-1.96759
Ncor2													3.71657	0.948348	0.90873	-1.97048
Zmiz1													5.56708	1.41652	1.48964	-1.97457
Wbscr27													3.10486	0.785926	0.643497	-1.98206
Prr12													1.23974	0.313792	-0.681041	-1.98216
Map1b													23.3488	5.88677	3.55138	-1.9878
Itga1													14.7552	3.71368	2.888	-1.9903
Gas7									7.12766	3.20192	2.25618	-1.15449	9.27925	2.32498	2.21561	-1.99679
Sipa1l3													2.25178	0.559267	0.166337	-2.00946
Ubr4													19.1866	4.75937	3.2564	-2.01126
Nhsl1													4.65264	1.14462	1.20646	-2.02318
Col11a1													1.74679	0.428972	-0.208169	-2.02575
Fasn													76.322	18.4738	5.23072	-2.04662
Ces1d													1.42961	0.344714	-0.510453	-2.05215
Bcl9l													6.73629	1.62075	1.72431	-2.05529
Tns1													1.21606	0.288916	-0.754532	-2.07349
Slit3													7.84515	1.86304	1.93473	-2.07414
Scg2													3.50342	0.823211	0.764049	-2.08943
Akap12													22.8681	5.34936	3.46732	-2.0959
Stard8													3.90522	0.908352	0.913364	-2.10408
Kif21b													6.21214	1.39468	1.55751	-2.15516
Zfhx3													4.29589	0.960586	1.02247	-2.16097
Atp2b4													1.843	0.407999	-0.205653	-2.17542
Tnrc18					14.8208	7.67532	3.41489	-0.949325					8.56744	1.8889	2.00821	-2.18132
Plec													35.2357	7.64121	4.03638	-2.20516
Abca9									1.66216	0.552284	-0.0617292	-1.58958	2.14834	0.463678	-0.00279124	-2.21203
Map1a													5.51644	1.18976	1.3572	-2.21307
Lrp1													34.3596	7.31582	3.98683	-2.23162
Mll2					6.84902	2.67881	2.09874	-1.35431					3.17941	0.666475	0.541691	-2.25414
Heg1									9.36231	4.59309	2.71316	-1.0274	11.798	2.41984	2.41769	-2.28556
Rin3													0.929443	0.187352	-1.26087	-2.31062
Apod													3.05163	0.597227	0.432966	-2.35323
Pdlim3													3.55888	0.695376	0.653644	-2.35556
Arhgap20									0.83096	0.289694	-1.02727	-1.52025	1.22049	0.23464	-0.902009	-2.37894
Ttc28													2.18327	0.417336	-0.0671141	-2.38721
Fmod													2.17365	0.396647	-0.106976	-2.45419
Notch1													1.93466	0.342918	-0.295992	-2.49614
Svep1									16.4814	7.63729	3.48791	-1.10971	15.923	2.81925	2.74418	-2.49773
Hspg2													34.0795	6.00175	3.83811	-2.50545
Pappa2									3.24657	1.3082	1.04325	-1.31133	4.14863	0.716706	0.786044	-2.53318
Abca1									7.31314	3.14661	2.26214	-1.21669	10.1233	1.62118	2.01833	-2.64256
Sorbs2									2.79733	0.967765	0.71839	-1.53132	4.26183	0.667371	0.754017	-2.67491
Prelp									4.56301	1.51719	1.39569	-1.58858	5.08338	0.771649	0.985902	-2.71977
Fat4									6.91717	2.96332	2.1787	-1.22297	5.84806	0.887098	1.18756	-2.72079
Lrrc17									1.49159	0.278424	-0.633897	-2.4215	2.23224	0.329563	-0.221441	-2.75987
Scara5					2.57889	0.807427	0.529077	-1.67535	3.14312	0.577825	0.430451	-2.44349	3.68246	0.518099	0.465985	-2.82937
Usp17le													0.976036	0.129484	-1.49207	-2.91416
Agt													1.57745	0.19006	-0.868939	-3.05307
Has2					5.44972	17.4999	3.28773	1.68309	8.05407	18.7988	3.62114	1.22285
Ctsw									0.27882	1.95799	-0.43661	2.81197
Sepp1					30.4599	13.9736	4.36674	-1.12421
Neat1					28.2782	12.2634	4.21895	-1.20533
Pdlim2					16.2003	6.85947	3.39802	-1.23985
Akr1c14					15.1033	6.86442	3.34796	-1.13765
Adam12					4.60858	10.7067	2.81238	1.21612
Pmepa1					4.40978	11.1191	2.80784	1.33426
Ccbe1					2.68707	5.94614	1.99899	1.14592

## Sheet: 18hr avg log 2 >1
Gene	mock_fpkm_12	infected_fpkm_12	avg_log2_fpkm_12	log2_ratio_12	mock_fpkm_18	infected_fpkm_18	avg_log2_fpkm_18	log2_ratio_18
Anxa8					5.15493	20.5137	3.36223	1.99256
Has2					5.44972	17.4999	3.28773	1.68309
Il4ra					8.26888	21.4314	3.73467	1.37396
Pmepa1					4.40978	11.1191	2.80784	1.33426
Adam12					4.60858	10.7067	2.81238	1.21612
Ccbe1					2.68707	5.94614	1.99899	1.14592
Tnrc18					14.8208	7.67532	3.41489	-0.949325
Sepp1					30.4599	13.9736	4.36674	-1.12421
Akr1c14					15.1033	6.86442	3.34796	-1.13765
Neat1					28.2782	12.2634	4.21895	-1.20533
Pdlim2					16.2003	6.85947	3.39802	-1.23985
Mll2					6.84902	2.67881	2.09874	-1.35431
8430408G22Rik					8.9737	2.23621	2.16338	-2.00465

## Sheet: 24 hr avg log 2 >1
Gene	mock_fpkm_24	infected_fpkm_24	avg_log2_fpkm_24	log2_ratio_24
Rpph1	2415.26	10785.8	12.3174	2.15888
Rprl3	520.94	2118.74	10.037	2.02402
Anxa8	5.90624	22.4451	3.52528	1.92609
Upp1	1.10521	3.80988	1.03703	1.78543
Hp	4.08263	13.8506	2.91069	1.76238
Angptl4	6.54626	18.6705	3.46668	1.51202
Hist4h4	16.5932	43.8254	4.75311	1.40118
Hist1h1a	56.3805	145.977	6.50336	1.37247
Has2	8.05407	18.7988	3.62114	1.22285
Junb	45.8656	102.881	6.10209	1.16549
Il4ra	8.68755	18.8047	3.67599	1.11407
Hist1h4c	213.772	461.143	8.2945	1.10914
Heg1	9.36231	4.59309	2.71316	-1.0274
Aim1	6.80272	3.26486	2.23657	-1.05909
Sik1	16.1959	7.70413	3.48159	-1.07192
Svep1	16.4814	7.63729	3.48791	-1.10971
Adamts9	14.2459	6.47316	3.26347	-1.138
Gas7	7.12766	3.20192	2.25618	-1.15449
Limch1	6.5403	2.88974	2.12015	-1.17842
9930013L23Rik	4.75795	2.08179	1.65408	-1.19252
Tcf7l2	5.34374	2.30555	1.81148	-1.21274
Abca1	7.31314	3.14661	2.26214	-1.21669
Fat4	6.91717	2.96332	2.1787	-1.22297
Gstm1	37.6036	16.038	4.61811	-1.22938
Cryab	25.3585	10.5038	4.02862	-1.27156
Kcnj2	27.5608	11.3374	4.14378	-1.28153
Pappa2	3.24657	1.3082	1.04325	-1.31133
Ephx1	6.00592	2.38001	1.91868	-1.33542
Ogn	48.2001	18.9591	4.91789	-1.34615
Prelp	4.56301	1.51719	1.39569	-1.58858
8430408G22Rik	9.08723	2.20476	2.16223	-2.04322

## Sheet: 36 hr avg log 2>1
Gene	mock_fpkm_36	infected_fpkm_36	avg_log2_fpkm_36	log2_ratio_36		Genes for qPCR Validation
Rpph1	1010.52	6872.13	11.3637	2.76566		Upregulated	Downregulated
Rprl3	208.38	1313.5	9.03114	2.65613		Hist1h1a	Col1a2
Cxcl10	9.10355	56.3803	4.50177	2.63069		Timm8a1	Malat1
Il6	0.969659	4.4256	1.05071	2.19032		Junb	Scd2
Ccl5	1.79466	7.92961	1.91548	2.14354		Snhg1	Marcks
Gm12603	1.04712	4.36748	1.09661	2.06037		Uqcrq	Fn1
Anxa8	6.75426	27.2313	3.7615	2.0114
Rab20	2.57591	9.39081	2.29817	1.86617
Dnajc15	3.53033	12.819	2.75001	1.86041
Ifit1	8.29817	29.5738	3.96952	1.83345
Oas1b	1.42247	5.023	1.41847	1.82015
Rmrp	3242.39	11171.4	12.5552	1.78468
Angptl4	4.07652	13.9071	2.91254	1.77041
Mx2	1.79507	5.8515	1.69642	1.70477
Gm11974	12.5134	40.2499	4.48816	1.68551
3300005D01Rik	2.32002	7.44939	2.05563	1.68299
Terc	7.46889	23.7667	3.73588	1.66998
Slfn2	1.749	5.38682	1.61798	1.6229
Chchd1	11.5322	34.7916	4.32413	1.59307
Zbp1	2.32203	6.94895	2.00609	1.58141
Lrr1	2.89599	8.47924	2.309	1.54988
Upp1	1.26243	3.64811	1.10168	1.53095
Tex30	11.9615	34.2949	4.34012	1.5196
Rpl22l1	10.1444	28.9246	4.09842	1.51161
Hist1h1a	57.4485	162.115	6.59254	1.49668
Maff	9.33493	25.9766	3.96089	1.4765
Rpl41	999.574	2733.23	10.6908	1.45122
Hist4h4	15.6098	42.0516	4.67923	1.42971
Rtp4	8.42968	22.4681	3.78264	1.41433
Cenpl	3.73928	9.92633	2.60701	1.4085
1600020E01Rik	3.68626	9.77136	2.58536	1.4064
Snhg1	63.554	166.559	6.6849	1.38998
Fam229b	2.32642	6.05428	1.90803	1.37984
Uqcrq	41.7125	108.379	6.07117	1.37753
Dyrk3	1.63528	4.21279	1.39216	1.36524
Acn9	3.25113	8.26119	2.37365	1.34541
Cxcl1	34.3108	86.9933	5.77171	1.34224
Zfp472	3.859	9.67487	2.61123	1.32602
Siah1b	9.87182	24.6105	3.96226	1.31789
Phf7	1.95901	4.86246	1.62591	1.31156
Usp18	7.43863	18.4146	3.54891	1.30774
Tomm5	44.8701	110.996	6.14102	1.30668
Hist1h3a	81.0938	198.556	6.98746	1.29188
Smim3	2.62229	6.41457	2.03609	1.29053
Timm8a1	60.4758	147.222	6.56007	1.28356
Hist2h4	154.254	374.586	7.90916	1.27999
Mrpl46	9.26748	22.4633	3.85084	1.27732
Isg15	13.1902	31.8721	4.35781	1.27283
Hp	3.15109	7.60945	2.29182	1.27194
Ier2	11.6167	28.0068	4.17292	1.26958
Plac8	130.491	314.191	7.66165	1.26769
N4bp3	2.27981	5.4472	1.81721	1.2566
Rfc3	41.1889	97.7435	5.98756	1.24675
Iigp1	2.12731	5.04338	1.71171	1.24536
Zfp119b	3.9111	9.25698	2.58906	1.24297
Actr6	2.99238	7.00906	2.19526	1.22793
Junb	48.6008	113.486	6.21464	1.22346
Prim1	37.0433	85.1727	5.81173	1.20118
Hist1h4i	88.3027	201.488	7.05947	1.19016
Nup35	15.6663	35.6785	4.56329	1.18739
Nxt1	24.4247	55.5872	5.20347	1.18641
Rps27a	136.822	311.272	7.68909	1.18588
Rgs16	3.64393	8.26037	2.45585	1.18071
Rps14	245.741	554.023	8.5274	1.17281
Snrpe	102.889	231.487	7.26987	1.16984
Commd2	4.90433	11.0155	2.87776	1.16741
Apitd1	3.2927	7.38563	2.302	1.16545
Zfp429	2.0192	4.52675	1.59613	1.16469
Tnfrsf12a	116.297	260.712	7.44399	1.16464
Pop5	10.5795	23.6827	3.98448	1.16256
Ppih	20.0858	44.8689	4.90787	1.15954
Orc6	45.9323	102.553	6.10083	1.15879
Timp1	227.746	508.393	8.41054	1.15852
Hddc2	8.24594	18.3357	3.62013	1.1529
Tipin	43.2355	95.8157	6.00817	1.14805
Mtfr2	2.13558	4.72868	1.66803	1.14681
Tnfrsf9	2.94408	6.51866	2.1312	1.14676
1810037I17Rik	30.204	66.8187	5.48942	1.14551
Ormdl1	8.45673	18.6894	3.65212	1.14405
Bbs5	5.59889	12.3706	3.05699	1.1437
Hist1h4c	208.125	458.655	8.27129	1.13996
Lsm7	23.5033	51.7419	5.12403	1.13847
Mrpl12	8.09356	17.8054	3.58551	1.13747
Ptrh1	6.04635	13.2885	3.16409	1.13604
Pdcd10	13.5663	29.7376	4.32809	1.13226
Med21	14.7263	32.2464	4.44569	1.13074
Psmg4	19.3913	42.4593	4.84267	1.13067
Dhfr	21.9113	47.9379	5.01835	1.12949
Rpl39l	53.0315	116.019	6.2935	1.12944
Hist1h3f	36.0181	78.672	5.73421	1.12713
Igtp	3.97235	8.67142	2.55313	1.12628
Ccne1	13.9729	30.3851	4.36493	1.12073
Prmt1	30.9968	67.3552	5.51388	1.11967
Arrdc3	12.1202	26.226	4.15613	1.11358
Dctpp1	39.7754	85.5253	5.86604	1.10447
Rpl17	205.38	441.584	8.23435	1.10439
Sat1	32.4863	69.686	5.57228	1.10104
Ndufaf2	14.3781	30.7536	4.39424	1.09688
Immp1l	10.8002	23.0256	3.97908	1.09218
2410006H16Rik	90.1528	192.078	7.03992	1.09125
Hist1h4m,Hist1h4n	179.048	381.363	8.02961	1.09082
Mrto4	57.3385	122.008	6.38613	1.0894
Get4	32.6326	69.3073	5.57159	1.08669
Nme6	16.014	34.0016	4.5444	1.08627
Efcab7	4.64897	9.82042	2.75635	1.07887
Tm4sf1	53.5782	113.071	6.28233	1.07751
Mrpl14	32.7526	68.9637	5.57065	1.07423
Hist1h3e	500.176	1051.67	9.50238	1.07217
Rps24	414.422	870.918	9.23067	1.07144
Gins1	12.2768	25.6638	4.14976	1.0638
Rpl9	528.519	1104.22	9.57731	1.063
Bloc1s2a	13.4203	28.0188	4.27733	1.06198
Npm3	61.5485	128.457	6.4744	1.06149
Cenpw	8.51865	17.7639	3.62075	1.06025
Oas1a	3.77924	7.87447	2.44764	1.05909
Hist1h3b	34.4996	71.7091	5.6363	1.05558
Gtf2a2	19.4551	40.4022	4.80922	1.05429
Gm14295	65.4525	135.902	6.5594	1.05405
Mrps33	19.1371	39.7261	4.78516	1.05371
Hist1h4j	92.381	191.611	7.05578	1.05251
Cenph	13.2813	27.4972	4.25627	1.04989
Gem	3.38716	7.00899	2.28464	1.04913
Scarna13	58.7654	121.585	6.40136	1.04893
Itpa	33.4894	69.2581	5.58977	1.04828
H2afz	420.098	867.031	9.23726	1.04536
Ercc8	4.9384	10.1775	2.82568	1.04327
Rad51ap1	20.1838	41.4398	4.85404	1.03782
Mrpl20	63.5314	130.226	6.50714	1.03548
Nup37	24.076	49.3205	5.10682	1.03459
Cycs	42.3298	86.5521	5.91955	1.0319
Hspe1	231.172	471.008	8.36622	1.02678
Zfp948	22.8619	46.5675	5.02806	1.02638
Zbtb48	2.80478	5.71112	2.00083	1.02589
Pcna	269.143	547.765	8.58482	1.02518
Snrpd2	100.717	204.675	7.16568	1.02303
Ppil1	46.9396	95.0798	6.0619	1.01833
Polr2g	40.869	82.5196	5.8598	1.01373
Eef1e1	24.5115	49.4659	5.12187	1.01298
Fam195a	7.50983	15.1366	3.41437	1.01119
Mettl21d	8.30252	16.7189	3.55848	1.00986
Fam162a	50.8383	102.315	6.17236	1.00903
Dph3	5.70408	11.4744	3.01617	1.00835
Timm13	21.1303	42.492	4.90518	1.00788
Rps27l	85.432	171.75	6.92044	1.00746
Cinp	10.8234	21.7546	3.93967	1.00717
Pin1	10.8398	21.7807	3.94162	1.00671
Gng10	30.4885	61.1771	5.43256	1.00473
Polb	12.5558	25.1671	4.15187	1.00319
Bok	10.9679	21.9684	3.95629	1.00214
Rangrf	28.3753	56.7253	5.32624	0.999357
Gmnn	16.2886	32.5031	4.52415	0.996715
Lsm3	61.174	122.009	6.43285	0.995997
0610009D07Rik	17.7145	35.3284	4.64481	0.995898
Zfp593	4.33156	8.63835	2.61282	0.995869
Atp5e	49.8538	99.4152	6.13751	0.995763
Prkg2	8.04722	16.0253	3.50538	0.993789
Nhp2	56.8086	113.104	6.32477	0.993469
Zfp367	26.398	52.5518	5.21901	0.993312
Slc25a33	7.03651	14.0066	3.31145	0.993175
Hat1	62.3067	123.965	6.45755	0.992474
Trip13	28.4748	56.5936	5.32709	0.990953
Pfdn4	13.0311	25.8471	4.19791	0.988044
Cdca5	11.1299	22.0501	3.96954	0.986345
Il13ra1	33.4	66.0831	5.55399	0.984433
Gemin6	20.3373	40.1732	4.83711	0.982105
Rabl5	13.521	26.7086	4.24818	0.982102
Ndufb4	44.3138	87.3195	5.95896	0.978548
Hint1	162.319	319.572	7.83134	0.977309
Casp4	17.5117	34.3793	4.61686	0.973221
Nmral1	13.8464	27.159	4.2774	0.971919
Hist1h4h	213.13	417.85	8.22122	0.971251
Mrps23	15.7142	30.7906	4.45921	0.970421
Atp5l	97.0021	189.691	7.08373	0.967563
Dnaaf2	6.30753	12.2977	3.1387	0.963241
Dtymk	44.4944	86.7445	5.95713	0.963149
Hmgb2	41.3222	80.5024	5.8499	0.962115
C1d	7.251	14.1169	3.33877	0.961171
Dnajc9	42.2448	82.2364	5.8812	0.961003
Hist1h3g	77.9903	151.739	6.76534	0.960225
Timm10	22.7582	44.2661	4.98822	0.959816
Hist1h1b	118.828	231.033	7.37234	0.959224
Wdr76	6.98685	13.5839	3.28423	0.959184
Hist2h2bb	692.121	1345.31	9.9143	0.958842
Prl2c2	30.0758	58.4548	5.38989	0.958718
Polr2h	44.9619	87.3232	5.96946	0.957662
Ndufaf5	3.93811	7.64706	2.4562	0.957402
Wrap53	4.22216	8.19539	2.5564	0.956831
2700094K13Rik	80.3367	155.885	6.80616	0.956351
Shq1	7.19368	13.9451	3.32421	0.954956
Cox7b	44.3224	85.6674	5.94532	0.95071
Gins3	9.98999	19.2757	3.7946	0.948228
Sec61g	24.7082	47.6508	5.10067	0.947511
Rrp9	27.5606	53.109	5.25771	0.946349
Hist1h4f	78.1288	150.553	6.76096	0.946345
Mrpl49	28.4375	54.7236	5.30191	0.944369
Rpa3	36.3053	69.8458	5.6541	0.943993
Rps18	1063.71	2044.85	10.5263	0.94289
Rps3	249.407	479.103	8.43328	0.941834
Vps29	38.141	73.2311	5.72383	0.941114
Rpl5	307.76	590.224	8.73539	0.939457
Mrpl11	5.97787	11.453	3.04864	0.938022
Rpl35a	330.553	633.01	8.83741	0.937347
Rpl34-ps1	358.506	686.347	8.95432	0.936941
Traip	6.02949	11.5432	3.0605	0.936935
Cd63	188.103	360.105	8.02383	0.936895
Hist1h1d	37.6047	71.9892	5.70127	0.936867
Mrpl13	75.8132	144.854	6.71142	0.934079
Banf1	74.2712	141.812	6.68128	0.933105
Mad2l1	44.3239	84.6015	5.93631	0.932598
Med28	8.07884	15.4187	3.48038	0.932461
Exosc5	10.8771	20.6882	3.90698	0.927514
Dnph1	24.8251	47.2077	5.09734	0.927223
Dcun1d5	47.7346	90.7499	6.04039	0.926861
Polr2d	16.1829	30.7509	4.47948	0.926158
Tnfaip3	3.40827	6.46628	2.23099	0.923896
Lsm1	11.1866	21.1833	3.94428	0.921156
Blvra	15.6857	29.6989	4.43186	0.92096
Atp6v0b	67.8886	128.15	6.54339	0.916592
Klf10	17.0977	32.2694	4.55391	0.916364
Nsmce1	19.8297	37.3819	4.76693	0.914677
Nip7	25.6173	48.1858	5.13479	0.91149
Zfp944	7.10645	13.3648	3.28475	0.911237
Fbxo5	29.0085	54.5218	5.31358	0.910357
Ppa1	94.5689	177.707	7.01833	0.910063
Ereg	7.06254	13.2626	3.27474	0.909105
Mrpl32	24.9005	46.6995	5.09172	0.907232
Nup43	30.7048	57.5596	5.39369	0.906592
Cnbp	186.685	349.962	7.99776	0.906592
Eef1b2	103.101	193.263	7.14117	0.906507
Cdc6	11.4474	21.4443	3.96974	0.905574
Ccdc115	6.656	12.4678	3.1874	0.90548
Chchd4	20.0013	37.4442	4.77435	0.904648
Timm23	109.199	203.966	7.2215	0.901369
Abracl	29.0282	54.1424	5.30904	0.899304
Mrpl1	10.2872	19.1593	3.81138	0.897194
Ifi202b	62.776	116.834	6.42023	0.896175
Dpy30	54.0881	100.461	6.20387	0.893252
Mrpl28	72.0483	133.816	6.6175	0.893214
Nme2	373.058	692.551	8.98952	0.89252
AI413582	20.2033	37.4525	4.78175	0.890471
Sptssa	17.9762	33.31	4.61295	0.889867
Exosc2	31.9406	59.1794	5.44217	0.889704
Uchl3	50.858	94.1991	6.11302	0.889239
Med4	18.5331	34.2784	4.65563	0.887196
Wdr55	17.8079	32.9192	4.59765	0.886412
Mis18a	14.1309	26.1108	4.26368	0.885793
Anapc15	30.2887	55.964	5.36357	0.885719
Hist1h2ac	8.78185	16.2191	3.57707	0.885097
Rpl13a	263.958	487.252	8.48634	0.88436
Naa20	50.0482	92.3634	6.08725	0.884003
Tyms	22.4559	41.4142	4.93054	0.883031
Orc1	6.32457	11.6624	3.10238	0.882825
Taf9	125.204	230.446	7.40821	0.880148
Ran	279.371	514.056	8.56591	0.879743
Polr2c	39.9306	73.4479	5.75904	0.879226
Yrdc	22.9776	42.2072	4.96079	0.877261
Hist1h3h	166.774	306.037	7.81966	0.875812
Prpf38a	29.0847	53.3689	5.30006	0.875739
Pno1	42.2455	77.3906	5.83741	0.873361
Rcc1	21.4755	39.3267	4.86103	0.872817
Ube2v2	11.7077	21.3923	3.9842	0.869634
Rnf7	40.3959	73.7999	5.77084	0.86941
Eed	13.8338	25.2618	4.22451	0.86876
Psma7	112.931	206.217	7.25366	0.868722
Tceb1	45.0843	82.3236	5.92889	0.868681
Rpf2	38.6592	70.4591	5.70573	0.865974
Shmt1	27.0846	49.2757	5.1911	0.863404
2810417H13Rik	60.7835	110.464	6.35652	0.861825
Rpp30	28.1333	51.126	5.2451	0.861778
Tpt1	622.745	1131.09	9.713	0.861
Tssc4	15.9976	29.0488	4.4301	0.860623
Pbk	34.7521	63.0938	5.54923	0.860398
Pfdn1	33.2684	60.354	5.48573	0.859297
Polr1d	88.7433	160.769	6.90021	0.857279
Psma3	104.873	189.958	7.14102	0.857037
Mrps22	19.166	34.6955	4.68858	0.856199
Ccl2	95.3847	172.601	7.00349	0.855611
Rpl15	349.033	631.452	8.87487	0.85531
Dimt1	11.3316	20.4739	3.929	0.853434
Erh	98.2524	177.437	7.04479	0.852742
Snrpg	155.944	281.553	7.71107	0.852378
Sec61b	63.2715	113.952	6.40788	0.848799
Psmd10	17.238	31.0141	4.53119	0.847332
Errfi1	23.3694	42.036	4.97005	0.847005
Slbp	91.9631	165.346	6.94616	0.846361
Birc5	55.9992	100.563	6.22965	0.844621
Eif6	89.7826	161.209	6.91058	0.844425
Cenpa	29.6962	53.2608	5.3136	0.842796
Hist1h2bm	234.732	420.732	8.29581	0.841887
Cenpq	31.7353	56.8403	5.40843	0.840826
Rps7	347.959	621.753	8.86149	0.837424
Orc2	31.6272	56.5125	5.4018	0.837404
Snrpd1	56.0466	100.094	6.22688	0.836657
Fau	452.468	807.172	9.2392	0.83506
Rps10	770.237	1371.08	10.0051	0.831938
Depdc1a	26.2508	46.7201	5.13013	0.831682
3230401D17Rik	31.2114	55.4228	5.3782	0.828407
Wbp5	146.851	260.607	7.61197	0.827523
Pycrl	24.0465	42.6563	5.00122	0.826932
Polr1c	76.186	135.141	6.66489	0.826868
Yars2	23.3834	41.437	4.96013	0.825435
Lsm4	58.8746	104.327	6.29227	0.825395
Rpl35	788.871	1395.75	10.0352	0.823179
Cacybp	81.3143	143.667	6.75601	0.821148
Ccnl1	16.4653	29.0834	4.45174	0.820767
Cpsf4	20.4993	36.1927	4.76756	0.820124
Tk1	57.6772	101.663	6.25879	0.817722
Coq10b	21.2718	37.4669	4.81921	0.816674
Yaf2	14.6231	25.7485	4.2783	0.816239
Nme1	107.888	189.934	7.16137	0.815964
Tbca	96.9376	170.621	7.00682	0.815667
Dut	28.9175	50.8263	5.26069	0.813632
Kif18a	17.2948	30.3401	4.51771	0.810888
Dbr1	15.9364	27.9455	4.3994	0.81029
Hist1h4a	182.942	320.701	7.92016	0.809843
Slc25a5	291.959	509.506	8.59129	0.803333
1810009A15Rik	56.3322	98.2171	6.2169	0.802014
Ldha	525.351	913.69	9.43635	0.798423
Cyc1	65.6106	114.059	6.43475	0.797779
Chaf1b	26.8006	46.5592	5.14259	0.796801
Ssr4	80.9977	140.699	6.73814	0.796659
Rpl36	911.431	1582.65	10.2301	0.796137
Uqcrh	87.3603	151.686	6.84693	0.796038
Ddx20	20.0327	34.7819	4.72227	0.79598
Mrpl40	24.9577	43.328	5.03932	0.795815
Tma7	86.094	149.36	6.82525	0.794809
Bnip3	57.453	99.6229	6.24136	0.794095
Hist2h2ac	276.455	478.661	8.50688	0.79196
Wdr4	11.7411	20.3114	3.94886	0.790722
Psmd13	44.0821	76.1611	5.85655	0.788861
Mrps7	48.4461	83.677	5.99253	0.788451
Rpl27	445.658	769.274	9.19357	0.787561
Nudcd2	30.1364	52.0142	5.30713	0.787398
Sumo3	34.5297	59.5458	5.50285	0.786162
Rpa2	28.6022	49.2878	5.23061	0.785104
Hist1h4k	302.217	519.543	8.63027	0.781658
Nmd3	31.4458	54.0394	5.36537	0.781144
Cox7a2	68.2893	117.283	6.48372	0.780262
Cops5	39.7576	68.2746	5.70322	0.780118
Smim15	30.5312	52.4287	5.32225	0.780072
Il4ra	9.35109	16.0569	3.61513	0.779987
Rpl12	774.238	1329.12	9.98644	0.779622
Pgp	47.7912	81.9891	5.96802	0.778687
Rbm7	47.3469	81.2221	5.9545	0.778602
Tomm20	34.2387	58.7102	5.48655	0.777983
Ppp1r14b	123.307	210.851	7.3331	0.773969
Fen1	29.5858	50.5459	5.27318	0.772689
Eif1	87.3318	149.003	6.83382	0.770762
Ap1s1	59.3156	101.041	6.27457	0.768457
Ostc	71.0058	120.901	6.53377	0.767817
Psmb5	77.3077	131.589	6.65622	0.767355
Mcm10	13.2345	22.4979	4.10898	0.765487
Ier5	12.9041	21.9227	4.07206	0.764596
Eif3i	117.261	199.022	7.25518	0.763205
Oaz1	152.204	257.374	7.62879	0.75786
Srsf7	57.9008	97.8953	6.23434	0.757656
Ppp1r8	38.6933	65.2883	5.65138	0.754741
Rfc2	44.2507	74.5167	5.84356	0.751864
Rwdd1	51.9498	87.2772	6.07329	0.748487
Xdh	42.124	25.0358	5.02125	-0.75065
Capn6	64.4235	38.0419	5.62952	-0.759998
Utp20	22.2243	13.1008	4.09282	-0.762483
Dcaf7	28.2267	16.6352	4.43758	-0.762821
Lss	134.668	79.2145	6.69048	-0.765571
Anapc1	41.5822	24.4421	4.9946	-0.766598
Abr	12.3678	7.26607	3.24485	-0.767342
Man2a1	59.5961	34.9701	5.5126	-0.769096
Ppp1r12a	26.4871	15.5418	4.34265	-0.769136
Nup98	29.2233	17.1407	4.4842	-0.769693
C1ra	28.5826	16.7278	4.45062	-0.772889
Matn2	25.1736	14.7299	4.26726	-0.773164
Grina	100.572	58.6846	6.2635	-0.777175
Aplp2	132.463	77.1621	6.65963	-0.779625
Atp2b1	25.3001	14.7189	4.27033	-0.781473
Erbb2ip	59.4169	34.5114	5.5009	-0.7838
Slc44a2	33.4132	19.3885	4.66974	-0.785217
Zfp871	15.6141	9.05147	3.57146	-0.786625
Oxr1	67.9298	39.302	5.69125	-0.789442
Arhgef2	37.1244	21.4523	4.81868	-0.791235
Hsd17b7	69.5478	40.1573	5.72376	-0.792343
Igfbp4	96.5687	55.681	6.1963	-0.794371
Sec24c	19.8496	11.4417	3.91363	-0.794809
Cltc	167.578	96.5867	6.99122	-0.794936
Cenpe	16.8967	9.72043	3.67984	-0.797649
Jmy	13.2317	7.60692	3.32662	-0.798614
Ppap2b	22.5448	12.9535	4.095	-0.799453
Ttbk2	4.69556	2.69361	1.83042	-0.801756
Aff4	27.26	15.6228	4.36715	-0.803133
Nipbl	16.7515	9.59745	3.66443	-0.803567
Man2b1	10.6861	6.11663	3.0152	-0.804927
Gli3	6.12448	3.50017	2.21101	-0.807162
Os9	19.0075	10.8601	3.84473	-0.807531
Cyp1b1	114.298	65.255	6.43234	-0.80864
Ndrg1	43.786	24.9879	5.04778	-0.80924
Asxl1	13.3066	7.59267	3.32934	-0.809463
Agap1	8.09952	4.60978	2.61127	-0.813139
Abcc1	24.2655	13.8071	4.19409	-0.813496
S1pr3	19.5881	11.1396	3.88477	-0.81428
2900097C17Rik	83.8489	47.6631	5.98226	-0.814919
2014-03-06	21.7266	12.3451	4.03363	-0.815524
Cnot1	48.8515	27.7572	5.20256	-0.815541
Cdk12	12.5287	7.11636	3.23915	-0.816025
Nfe2l1	71.7921	40.7727	5.75764	-0.816222
Atrx	22.6841	12.8717	4.09487	-0.817479
Ssbp3	30.2818	17.1819	4.5116	-0.817561
Ubap2l	34.6236	19.6424	4.70479	-0.817785
Sp1	23.3886	13.268	4.13881	-0.817855
Cep170	25.0114	14.1841	4.23536	-0.818311
Nr2f2	18.9313	10.7021	3.83126	-0.82288
Tbl1xr1	26.6379	15.0469	4.3234	-0.824014
Zbtb44	8.86956	5.00958	2.73678	-0.824173
Met	54.4515	30.709	5.35374	-0.82631
Wdr81	5.39947	3.04409	2.01941	-0.826807
Pde4dip	16.2294	9.14742	3.60695	-0.827173
Setd2	16.2755	9.16595	3.61046	-0.828346
Ankhd1	7.9698	4.48785	2.58028	-0.828519
Myo9b	17.9536	10.1097	3.75193	-0.828533
Abl1	17.7001	9.96615	3.73136	-0.828649
Lmtk2	7.53087	4.23594	2.49775	-0.830134
Mia3	18.793	10.5646	3.81664	-0.830957
Trim44	12.9455	7.27283	3.27845	-0.831862
Irx2	25.4469	14.2829	4.25282	-0.833201
Zfp292	9.04263	5.07111	2.75952	-0.834441
Sec24d	41.1567	23.0675	4.94542	-0.835266
Pikfyve	9.88955	5.53999	2.88789	-0.836022
Acsl3	88.5637	49.5828	6.05021	-0.836876
Ube3b	25.9297	14.5123	4.27787	-0.837329
Irx1	40.0597	22.4201	4.9054	-0.837359
Sec14l1	37.1283	20.7761	4.79565	-0.837594
Pygb	55.7348	31.1874	5.3817	-0.837615
Emilin1	23.0293	12.8723	4.1058	-0.839201
Iqgap3	13.0319	7.28287	3.28424	-0.839468
Rbm33	4.76256	2.66064	1.83176	-0.839964
Dmxl1	9.1818	5.12839	2.77864	-0.840271
Daam1	6.38032	3.56103	2.25296	-0.841334
Dennd4c	10.0768	5.62173	2.91199	-0.841951
Tmem245	8.77457	4.89301	2.71203	-0.842606
Aco1	44.9255	25.0468	5.06801	-0.842908
Edem3	15.2485	8.49993	3.50902	-0.843144
Syde1	22.7079	12.6527	4.08325	-0.843749
Cad	23.0519	12.8402	4.1047	-0.844218
Esyt1	13.2749	7.39388	3.30848	-0.844297
Eef2k	5.35053	2.97859	1.99716	-0.845052
Gigyf2	9.5186	5.29735	2.82801	-0.845479
Ift122	6.80066	3.78284	2.34257	-0.846205
Patl1	11.1939	6.22118	3.06091	-0.847453
Kif16b	7.09786	3.94465	2.40364	-0.847487
Kdm2a	19.5928	10.8757	3.86764	-0.849215
Lrrc58	50.4077	27.9802	5.23095	-0.849238
Jmjd1c	7.54909	4.19024	2.49167	-0.84927
Meis1	10.9757	6.08561	3.03082	-0.850839
Nuak1	13.9054	7.70907	3.37207	-0.851017
Mmp2	18.1758	10.0746	3.7583	-0.851296
Nbr1	26.3871	14.6212	4.29588	-0.851771
Gm2a	9.93616	5.50388	2.88657	-0.852239
Mical2	12.4192	6.87216	3.20763	-0.853737
Cdc42bpa	9.92632	5.48802	2.88377	-0.854973
Wdr7	4.54297	2.51029	1.75574	-0.855782
Gns	48.563	26.8322	5.17384	-0.855892
Ggcx	20.2957	11.2054	3.91461	-0.85698
Etv5	9.9268	5.47877	2.88259	-0.857477
Dip2a	8.93239	4.92645	2.7298	-0.858498
Foxd1	25.5321	14.0758	4.24469	-0.859095
Rictor	11.7725	6.48803	3.12756	-0.859568
Ccdc6	21.0841	11.6089	3.96762	-0.860924
Rmnd5a	18.6228	10.2496	3.78825	-0.861502
Lgals3bp	43.9215	24.1196	5.02449	-0.864721
Cep110	5.19321	2.85165	1.94421	-0.86483
Zeb1	11.7932	6.46196	3.12593	-0.867912
Hs6st1	11.3577	6.22261	3.07156	-0.868079
Hhip	8.46924	4.63365	2.64719	-0.870083
Nfatc3	31.7084	17.3401	4.55142	-0.870753
Tgfbr2	57.6004	31.4261	5.41095	-0.874116
Ly75	14.0822	7.68121	3.37857	-0.874467
Sipa1l2	6.27754	3.42076	2.21226	-0.875882
Fam120c	5.24683	2.85614	1.95276	-0.877379
Serinc5	10.3977	5.65702	2.93912	-0.87815
Tnrc6c	4.41075	2.39961	1.70191	-0.878224
Itsn1	12.404	6.7444	3.19321	-0.879043
Crim1	26.5729	14.4472	4.2923	-0.879166
Snrk	5.47648	2.97481	2.01302	-0.880451
Heatr6	9.78506	5.30837	2.84942	-0.882312
Kdm5c	21.149	11.4706	3.96119	-0.882649
Taf1	21.9198	11.8842	4.01257	-0.88319
Golim4	14.2892	7.74483	3.39504	-0.88362
Nedd4	408.986	221.604	8.23387	-0.884068
Mmp16	10.1223	5.47965	2.89677	-0.885381
Wrn	9.01016	4.87746	2.72884	-0.885423
Secisbp2l	23.5807	12.7644	4.11679	-0.885481
Kdm4b	7.27796	3.93819	2.42053	-0.886001
Mecp2	6.88542	3.72524	2.34044	-0.886211
Ctdsp2	41.3701	22.3683	4.92695	-0.887133
Ehbp1	7.54518	4.07924	2.47193	-0.887255
Phf8	4.9404	2.669	1.86046	-0.888329
Thbs2	11.4076	6.16126	3.06757	-0.888698
Ddr1	24.1888	13.0639	4.15189	-0.888754
Usp24	14.5081	7.83363	3.41423	-0.889106
Tprn	8.64665	4.66562	2.66711	-0.890072
Arsa	17.4987	9.44149	3.6841	-0.890161
Sin3a	17.7435	9.56997	3.70387	-0.890704
Scarf2	15.1173	8.14635	3.47214	-0.891975
Dicer1	6.18498	3.3329	2.18277	-0.891991
Cabin1	7.40883	3.99077	2.44296	-0.892579
Pip4k2b	25.1059	13.506	4.20274	-0.894426
Ncam1	33.7276	18.128	4.628	-0.89571
Rock2	18.6482	10.019	3.77282	-0.896298
Dnajc13	28.747	15.4389	4.39692	-0.896841
Cdc42bpb	11.741	6.30104	3.10454	-0.897893
Ppp2r3a	12.4711	6.689	3.19115	-0.898726
Wbp2	26.0702	13.9347	4.25247	-0.90372
1810011O10Rik	29.7087	15.8794	4.44095	-0.903729
Tsc22d2	21.1885	11.3175	3.95285	-0.904726
Fscn1	234.419	125.202	7.42053	-0.904832
Bnc2	7.23698	3.86216	2.4024	-0.90598
Ank3	3.51461	1.87338	1.3595	-0.907721
Mrc2	18.2665	9.73118	3.73687	-0.908514
Grlf1	22.1947	11.8146	4.01732	-0.909644
Vcl	76.1382	40.5255	5.79565	-0.90979
Map7d1	20.9023	11.1047	3.92934	-0.912491
Sox12	6.56901	3.48813	2.25906	-0.913222
Mvp	23.9299	12.697	4.12358	-0.914327
Abhd2	13.408	7.1103	3.28747	-0.915112
Nedd9	20.3276	10.7657	3.88687	-0.916998
Tspyl4	7.06105	3.73908	2.36128	-0.917199
Tmem63a	9.90132	5.24225	2.8489	-0.917435
4930402H24Rik	7.1726	3.79742	2.38376	-0.917477
Strn	16.4661	8.70984	3.58204	-0.918781
Esyt2	51.9251	27.4597	5.2388	-0.919116
Golga2	11.7428	6.20628	3.09372	-0.919976
Zyg11b	14.2558	7.53284	3.37334	-0.920283
Olfml2b	35.0331	18.5025	4.67015	-0.920998
4931406P16Rik	7.95728	4.20158	2.5316	-0.921343
Agrn	7.45659	3.93505	2.43745	-0.922134
Taok1	26.3652	13.9131	4.25947	-0.922191
Gas1	151.542	79.8841	6.78171	-0.923737
Rev3l	8.39011	4.42256	2.60679	-0.923808
Kat6b	3.00354	1.58225	1.12432	-0.924686
Arhgef28	3.46468	1.82469	1.33019	-0.925071
Xrn1	6.24686	3.28931	2.18046	-0.925346
Uaca	6.13134	3.22482	2.15271	-0.926984
2210018M11Rik	6.56525	3.45216	2.25117	-0.927351
Ccdc80	41.6465	21.8983	4.91644	-0.927376
Atg2b	7.05048	3.70658	2.35391	-0.927633
Col5a2	193.294	101.616	7.13082	-0.927669
Osr1	24.3766	12.8121	4.14343	-0.92799
Ubr5	38.0551	19.9951	4.7858	-0.928443
Ift140	7.15713	3.75987	2.37503	-0.928698
Farp1	23.2353	12.2025	4.07368	-0.929142
Ncoa3	5.90979	3.10261	2.09829	-0.929625
Mink1	5.79415	3.04036	2.06942	-0.930355
Tacc2	7.09384	3.71917	2.36077	-0.931586
Foxc1	9.64676	5.053	2.80359	-0.932904
Kank2	13.2588	6.94357	3.26228	-0.933201
Gnaq	14.5554	7.62243	3.39687	-0.933232
Tulp4	31.4952	16.4901	4.51029	-0.933532
Fgfr1	60.6255	31.733	5.45488	-0.933941
Zfp516	6.60728	3.45481	2.25633	-0.93545
Pmp22	93.8033	49.0337	6.08363	-0.935865
Rps6ka2	12.2215	6.38324	3.14282	-0.937061
Myo1e	12.6731	6.61139	3.19433	-0.938744
Zfp827	6.79031	3.54113	2.29384	-0.939268
Antxr1	12.5858	6.56259	3.184	-0.93946
Arhgap28	12.0163	6.26475	3.11709	-0.939664
Bmpr2	11.9111	6.20908	3.10431	-0.939855
Ubr2	14.2092	7.40581	3.35871	-0.940096
Hip1	10.374	5.40046	2.90399	-0.941818
Rara	9.00967	4.67586	2.69835	-0.946243
Chd4	41.5314	21.5484	4.90282	-0.946622
Iqgap1	40.6368	21.0718	4.87098	-0.947473
Flna	264.433	137.013	7.57246	-0.948589
Fam117b	7.72106	4.00009	2.47442	-0.948766
Magi1	5.52267	2.85982	1.99065	-0.949442
Spata13	3.45012	1.7842	1.31096	-0.951369
Ikzf2	3.47063	1.79467	1.31946	-0.951479
N4bp2	3.62751	1.87461	1.38279	-0.952389
Flii	34.1992	17.6707	4.61959	-0.952603
Chst12	17.2283	8.90184	3.63041	-0.952605
Clcn5	23.5923	12.1899	4.08393	-0.95263
Usp9x	78.9792	40.805	5.82704	-0.952727
Frmd4a	6.87812	3.55243	2.30541	-0.953208
Trip11	3.62676	1.87159	1.38147	-0.954417
Nid1	48.9133	25.2042	5.13387	-0.956563
Ralgds	17.4103	8.96747	3.64329	-0.957168
Rxra	16.5398	8.51865	3.56925	-0.957245
Prdm2	7.87245	4.0543	2.49813	-0.95736
Tbc1d5	10.1477	5.22468	2.86421	-0.957738
Heatr5a	10.0873	5.19351	2.85559	-0.957758
Eprs	101.732	52.3264	6.18905	-0.959163
Abhd4	18.377	9.45145	3.72018	-0.959294
Dock1	13.2141	6.79284	3.24401	-0.959991
Egfr	7.99988	4.11005	2.51957	-0.960822
Arap1	12.6272	6.48256	3.17751	-0.961899
Mdc1	10.6041	5.44172	2.92531	-0.962488
Ralgapa1	7.22239	3.70567	2.37111	-0.962742
Gtf3c1	11.9872	6.14794	3.10176	-0.96332
Fam160b1	8.50737	4.36084	2.60666	-0.964107
Chst14	12.6626	6.4837	3.17966	-0.965684
Abca5	10.6091	5.42794	2.92382	-0.966826
Nup188	18.215	9.31504	3.70331	-0.967493
Bcor	5.33903	2.73016	1.93278	-0.967592
Celf2	17.8924	9.14762	3.67734	-0.967879
Fads2	171.605	87.6771	6.93854	-0.96882
Synrg	4.6599	2.38084	1.73588	-0.968828
Setd5	23.5157	12.0107	4.0709	-0.969304
Tacc1	6.08562	3.10822	2.12075	-0.969316
Zswim8	16.9096	8.63287	3.59481	-0.96993
Pik3r4	4.89981	2.50113	1.80765	-0.970146
Zmat3	4.56601	2.33004	1.70564	-0.970579
Atp11a	16.1675	8.24068	3.52889	-0.972261
Rfx7	9.66282	4.92361	2.78608	-0.972728
Ulk2	7.06598	3.59781	2.334	-0.973771
Hipk1	17.4963	8.9076	3.64201	-0.973941
Col16a1	10.2029	5.19245	2.86366	-0.974492
Bhlhe41	3.1606	1.60762	1.17256	-0.975272
Acly	224.269	114.044	7.32127	-0.97564
Col3a1	102.717	52.2054	6.19433	-0.976404
Myo5a	21.487	10.8939	3.93542	-0.979944
Setx	16.9736	8.604	3.59511	-0.980213
Hunk	3.40963	1.72786	1.2793	-0.980629
Megf9	7.50846	3.80362	2.41795	-0.981144
Ablim1	13.4955	6.83637	3.26382	-0.981176
Fam168a	7.959	4.03153	2.50196	-0.98126
Lnpep	38.1714	19.3303	4.76361	-0.981628
Zfp318	5.08495	2.5744	1.85523	-0.981997
Herc1	5.09838	2.5788	1.85837	-0.983339
Thbs1	150.01	75.8025	6.73654	-0.984741
Cpd	19.4654	9.82082	3.78934	-0.986997
Cat	34.3292	17.3173	4.60775	-0.987222
Spry1	5.04301	2.5436	1.84058	-0.987413
Hivep2	5.00357	2.52261	1.82894	-0.988041
Sec31a	72.8102	36.6864	5.69162	-0.988895
Acsf2	4.43479	2.23222	1.65367	-0.990387
Tle3	8.19604	4.12091	2.53894	-0.991964
9930021J03Rik	6.57442	3.3047	2.22069	-0.992344
Arhgef10	17.1494	8.61802	3.60372	-0.99273
Emilin2	3.76383	1.89124	1.41577	-0.992869
Ap3d1	25.4291	12.7699	4.17154	-0.993733
Pck2	46.2688	23.229	5.03491	-0.994113
Prpf8	60.3831	30.2851	5.4183	-0.995537
Pkd2	30.4928	15.2893	4.43242	-0.995946
Dnmbp	6.32341	3.16161	2.16068	-1.00004
Tcf4	14.302	7.15072	3.33812	-1.00006
Tnrc6a	6.05276	3.02444	2.09713	-1.00093
Cramp1l	4.56727	2.28183	1.69076	-1.00114
Ski	26.8324	13.4042	4.24526	-1.00129
Elovl6	59.1847	29.5502	5.38612	-1.00206
Vps13a	15.6038	7.78671	3.46242	-1.00281
Itgbl1	32.1302	16.0337	4.50445	-1.00282
Wwc1	6.95499	3.46918	2.29632	-1.00345
Cep164	3.44764	1.71947	1.28379	-1.00365
Kif1b	26.0094	12.9697	4.19902	-1.00389
Setd7	16.2992	8.12576	3.52462	-1.00423
Ralgapb	15.4265	7.68282	3.44449	-1.0057
Zyx	138.843	69.1353	6.61433	-1.00596
Med13	17.1533	8.54076	3.59739	-1.00605
Pbxip1	7.37842	3.67066	2.37968	-1.00727
Ccser2	14.8008	7.36135	3.38379	-1.00763
Ssh1	4.11071	2.04284	1.53498	-1.00881
Pcdh18	43.5884	21.6581	4.94135	-1.00904
Pear1	5.14659	2.5561	1.85878	-1.00967
Sash1	7.08617	3.51768	2.31982	-1.01038
Col4a5	31.3926	15.5818	4.46707	-1.01056
Aspm	16.8467	8.3567	3.56866	-1.01146
Adamts5	26.3139	13.0471	4.21171	-1.0121
Phc1	8.10247	4.01636	2.51213	-1.01247
Fndc3b	21.0608	10.4201	3.88889	-1.01519
Rad54l2	4.21781	2.08643	1.56877	-1.01546
Elk4	10.4767	5.1821	2.88132	-1.01558
Kdm4a	23.2551	11.4984	4.03142	-1.01611
Mki67	41.1033	20.3217	4.85307	-1.01623
Gxylt2	15.1915	7.5021	3.41624	-1.0179
Prkdc	4.10895	2.02586	1.52865	-1.02024
Sall2	3.46167	1.70665	1.28132	-1.0203
Marcks	177.492	87.323	6.95995	-1.02332
Sertad2	18.696	9.1969	3.7129	-1.02351
Lrrk1	8.31132	4.08761	2.54317	-1.02382
Ncor1	26.3357	12.9465	4.20672	-1.02446
Pcdh19	15.3021	7.51872	3.42307	-1.02517
Rapgef2	8.72733	4.28119	2.61178	-1.02753
Slc7a2	14.8419	7.27823	3.3776	-1.02802
Dab2	10.3476	5.06797	2.85632	-1.02982
Smarcc2	18.2638	8.93977	3.67558	-1.03068
Sel1l	18.6025	9.10102	3.70173	-1.0314
Samd4b	7.34187	3.59058	2.36018	-1.03193
Eif2c1	6.98798	3.41672	2.28874	-1.03226
Maf	8.64055	4.22457	2.59496	-1.03232
Sos1	13.5489	6.62229	3.24372	-1.03277
Ldlr	98.0666	47.8768	6.09847	-1.03444
Myo1d	7.41492	3.61966	2.37314	-1.03458
Mga	11.7134	5.71643	3.0326	-1.03497
Ulk1	5.03927	2.45916	1.81569	-1.03505
Wdtc1	5.80013	2.82857	2.01808	-1.03601
Klhl24	14.6416	7.13756	3.35372	-1.03657
Baz2b	3.6186	1.76275	1.33663	-1.0376
C1rb	12.783	6.22633	3.15727	-1.03777
Mllt4	25.2159	12.2732	4.13685	-1.03882
Mast3	5.5374	2.69452	1.94962	-1.03918
2310067B10Rik	5.16011	2.50961	1.84743	-1.03994
Pacs2	3.93488	1.91228	1.45581	-1.04103
Sec24b	12.2004	5.92758	3.08815	-1.04141
Clstn1	58.2287	28.2679	5.34238	-1.04257
Gcn1l1	15.6611	7.59813	3.44738	-1.04347
Fam222b	3.66305	1.77512	1.35048	-1.04513
Dennd4a	11.3196	5.48213	2.97774	-1.04601
Ano6	27.6764	13.3933	4.26701	-1.04714
Dzip1	8.64929	4.18437	2.5888	-1.04757
Bcr	10.0851	4.87243	2.8094	-1.04951
Sepn1	18.4617	8.91441	3.6813	-1.05032
Zc3h7b	18.589	8.9757	3.6912	-1.05035
Eya1	3.2697	1.57838	1.1838	-1.05071
Micall2	15.5186	7.48214	3.42969	-1.05248
Dock7	20.0371	9.6582	3.79818	-1.05285
Itfg3	18.9074	9.10842	3.71404	-1.05368
Myadm	65.9431	31.7459	5.51582	-1.05465
Psd3	2.89708	1.39441	1.00713	-1.05494
Mtor	6.56195	3.15815	2.1866	-1.05504
Sesn2	10.7826	5.1883	2.90295	-1.05537
Polr2a	12.5398	6.03306	3.12067	-1.05555
Arhgef12	13.3297	6.41248	3.20873	-1.05569
Man2b2	9.66504	4.64588	2.74436	-1.05682
Arfgef2	10.3614	4.97631	2.84411	-1.05807
Larp1	37.7689	18.1364	4.70997	-1.05831
Tiam1	8.6804	4.16542	2.58811	-1.0593
Gpr124	20.7785	9.96657	3.84706	-1.05992
Shroom4	3.04862	1.46133	1.07772	-1.06087
Numbl	9.05072	4.33225	2.64657	-1.06292
Cul7	36.5834	17.5046	4.66139	-1.06346
Ecm1	25.5557	12.2213	4.14345	-1.06425
Epg5	3.73685	1.78667	1.36955	-1.06455
D930015E06Rik	5.22737	2.49677	1.85307	-1.06602
Atf7	5.55513	2.65277	1.94066	-1.06632
Trak1	5.35453	2.55542	1.88716	-1.0672
Ehd3	2.93003	1.39782	1.01705	-1.06774
Amotl1	13.2173	6.30186	3.19007	-1.06858
Itpr3	12.7172	6.06192	3.13424	-1.06893
Foxn3	8.00154	3.81332	2.46566	-1.06923
Pak3	29.6029	14.0995	4.35262	-1.07009
Gsk3b	16.4369	7.82745	3.5037	-1.07032
Hk1	20.8458	9.92169	3.84614	-1.0711
Nbas	7.31	3.47701	2.33386	-1.07202
Lgr4	5.37508	2.55552	1.88995	-1.07267
Atrn	9.87718	4.695	2.76761	-1.07297
Pcdhgc3	43.0242	20.4385	4.89015	-1.07386
Dpysl2	85.3729	40.5485	5.87864	-1.07413
Cachd1	4.0067	1.90203	1.46498	-1.07487
Supt6	13.7948	6.54596	3.24833	-1.07545
Snrnp200	43.4701	20.6218	4.90402	-1.07585
Nbeal1	8.44797	4.00553	2.5403	-1.07661
Eya4	22.5674	10.6972	3.95766	-1.07701
Fam65a	4.28767	2.03154	1.56138	-1.07762
Slc38a1	14.7748	6.99955	3.34616	-1.0778
Qser1	12.5966	5.96523	3.11577	-1.07838
Atg9a	11.1645	5.28614	2.94153	-1.07863
Erc1	7.19401	3.40193	2.30657	-1.08044
Myo9a	13.9804	6.60819	3.26479	-1.08108
Plcb4	7.75448	3.66455	2.41433	-1.08139
Fam193a	8.70965	4.11324	2.58144	-1.08234
Ankrd17	25.7844	12.173	4.14702	-1.08281
Lrp6	12.4551	5.87944	3.09717	-1.08299
Zfp369	6.21696	2.93106	2.09382	-1.08479
Tgfbr3	28.3211	13.3511	4.28135	-1.08492
Gpc4	52.5498	24.7507	5.17251	-1.08622
Tspan7	27.9597	13.1609	4.26173	-1.08709
Slc1a4	22.1883	10.4383	3.92777	-1.08791
Ccdc141	5.26874	2.47785	1.85327	-1.08837
Med25	9.58738	4.50235	2.71591	-1.09046
Ankrd52	7.56688	3.54497	2.37274	-1.09393
Zkscan8	5.8546	2.74184	2.00236	-1.09443
Sema3c	30.2723	14.1719	4.37244	-1.09497
Aph1b	10.0935	4.7247	2.78779	-1.09513
Trappc9	10.7909	5.0501	2.88403	-1.09543
Sfmbt2	2.93901	1.37534	1.00756	-1.09554
Zc3h4	5.67558	2.65524	1.95681	-1.09593
Magi3	12.7126	5.94535	3.11997	-1.09643
Dnajc16	6.47447	3.02749	2.14644	-1.09664
Grn	100.671	47.0401	6.10466	-1.09769
Rfx1	3.277	1.53	1.16295	-1.09884
Mlxip	4.09348	1.90778	1.48261	-1.10143
Gpatch8	5.74166	2.6753	1.97058	-1.10177
Caskin2	3.3969	1.58214	1.21305	-1.10234
Prrc1	4.26705	1.98694	1.54189	-1.10269
Ece1	22.0554	10.2637	3.91127	-1.10358
Zzef1	5.25452	2.44362	1.84129	-1.10454
Plag1	3.96756	1.84493	1.43591	-1.10469
Polr1a	38.3205	17.8102	4.70734	-1.10541
Tmem131	9.29004	4.31017	2.66171	-1.10794
Lamb2	23.7903	11.0304	4.01786	-1.10889
Arid2	8.75568	4.05613	2.57516	-1.11012
Cgnl1	4.42561	2.04958	1.5906	-1.11055
Ndrg4	5.74899	2.65951	1.96723	-1.11215
Dclk1	67.0699	31.0149	5.51124	-1.1127
Ctnnd1	51.8911	23.9859	5.14076	-1.1133
Smg1	16.2154	7.48072	3.46123	-1.11612
Sbf2	8.41236	3.8806	2.5144	-1.11623
Sptan1	52.7122	24.3135	5.16188	-1.11638
Cc2d2a	8.76954	4.04426	2.57419	-1.11663
Ddr2	54.6555	25.184	5.21337	-1.11786
Ints1	14.9853	6.90245	3.34629	-1.11837
Mef2d	6.6754	3.0729	2.17923	-1.11925
Chd2	4.83103	2.22346	1.71257	-1.11952
Kif13a	4.02813	1.85282	1.44992	-1.12039
Lmo7	17.4501	8.02136	3.56451	-1.12132
Gramd1b	5.30205	2.43521	1.8453	-1.1225
Sh3pxd2a	14.983	6.87793	3.34361	-1.12328
Wiz	5.38959	2.47363	1.8684	-1.12355
Plxna3	5.24181	2.40535	1.82816	-1.12382
Mov10	14.8382	6.80739	3.32917	-1.12414
Man2a2	7.64642	3.50624	2.37235	-1.12486
Ndst1	10.5278	4.82343	2.8331	-1.12607
Mfsd4	4.24372	1.94364	1.52205	-1.12657
Hectd1	20.5742	9.42234	3.79942	-1.12668
Amotl2	75.8847	34.6911	5.68112	-1.12924
Srgap2	6.81885	3.11596	2.2046	-1.12985
Tmem2	8.7946	4.01408	2.57084	-1.13155
Dysf	4.32413	1.97289	1.54636	-1.1321
Adam23	4.91532	2.24167	1.73093	-1.13271
Tnks1bp1	20.3574	9.27576	3.78047	-1.13402
Acot2	6.80813	3.10134	2.20008	-1.13437
Rprd2	5.83477	2.6577	1.97743	-1.1345
Arhgap31	4.36039	1.98506	1.55682	-1.13527
Pde8b	14.0364	6.38713	3.24313	-1.13593
Tjp1	14.3363	6.52356	3.27363	-1.13594
Zdhhc9	11.3884	5.18067	2.94132	-1.13635
Zcchc14	12.8774	5.85729	3.1185	-1.13654
Dhcr24	87.3889	39.7033	5.88028	-1.13819
Aldh6a1	4.59406	2.08698	1.63059	-1.13835
Tnks	20.6722	9.38283	3.79982	-1.1396
Vps13b	7.10369	3.22015	2.25785	-1.14144
Myo6	3.33361	1.51067	1.16614	-1.1419
Uhrf1bp1	9.74674	4.41665	2.71394	-1.14197
Zfp36l1	23.5052	10.6489	3.98377	-1.14228
Inf2	4.05445	1.83611	1.44808	-1.14285
Tnc	29.3222	13.251	4.30098	-1.14589
Epb4.1	4.59782	2.07685	1.62767	-1.14655
Dab2ip	3.8974	1.75898	1.38863	-1.14777
Phc3	5.31063	2.3954	1.83457	-1.14862
Rnf44	6.79585	3.06418	2.19008	-1.14915
Mid1	3.50098	1.57838	1.2331	-1.14931
Dock5	6.79566	3.0631	2.1898	-1.14962
Wdr19	5.42326	2.44374	1.86413	-1.15007
Ptprs	63.0459	28.4065	5.40324	-1.15018
Plekhg5	4.43048	1.99602	1.57229	-1.15034
Ar	3.48892	1.56967	1.22662	-1.15232
Phf15	5.05032	2.27085	1.7598	-1.15314
1700017B05Rik	6.99129	3.14128	2.22846	-1.15421
Wfs1	4.63803	2.07728	1.6341	-1.15882
Cog7	3.787	1.6961	1.34164	-1.15883
Glg1	39.6104	17.7176	4.72746	-1.1607
Ash1l	11.2592	5.03266	2.91218	-1.16171
Bag3	7.54576	3.37255	2.33475	-1.16183
Tanc1	10.1585	4.54021	2.76369	-1.16186
Kif26b	3.58793	1.60343	1.26216	-1.16199
Neo1	31.8241	14.2026	4.41007	-1.16396
Foxj2	4.53846	2.02317	1.59941	-1.16559
Ube4b	33.5015	14.9145	4.4824	-1.16751
Hdac4	5.1242	2.28084	1.77345	-1.16776
Ptprf	5.76344	2.56191	1.94207	-1.16971
Lifr	16.8914	7.50464	3.493	-1.17043
Ebf1	20.0896	8.91963	3.74268	-1.17139
Mdn1	6.67201	2.95611	2.15091	-1.17442
R3hdm2	7.65735	3.38865	2.34878	-1.17613
Dip2c	7.03228	3.10836	2.22507	-1.17784
Cbl	7.13546	3.1521	2.24566	-1.17869
Map4	31.7463	14.0092	4.39841	-1.18021
Dnm1	8.45157	3.72719	2.48865	-1.18113
Acss2	32.7403	14.4287	4.44193	-1.18213
Plxnb2	36.6227	16.1356	4.60342	-1.18249
Klf3	13.3644	5.88311	3.14845	-1.18374
Trps1	8.33088	3.66331	2.46581	-1.18532
Kirrel	28.5985	12.5713	4.24496	-1.18581
Il1rn	55.239	24.2652	5.19422	-1.1868
Ksr1	3.36165	1.4766	1.15572	-1.18689
Myof	65.5628	28.7948	5.44127	-1.18707
Pcyt1b	16.7128	7.33367	3.46871	-1.18835
Ubn2	3.83431	1.67926	1.3434	-1.19114
Gbf1	12.8348	5.62045	3.08634	-1.1913
Sema3f	17.1385	7.50117	3.50314	-1.19205
Smad3	16.3672	7.15728	3.43607	-1.19332
Pxdn	15.6614	6.84356	3.37194	-1.19439
Zc3hav1l	4.05497	1.77153	1.42234	-1.1947
Cobll1	7.93212	3.46416	2.39011	-1.1952
Chd9	6.43229	2.80574	2.08686	-1.19695
Rasgrp3	5.42487	2.36613	1.84106	-1.19706
Scaf1	6.11943	2.66889	2.01482	-1.19716
Smarca4	23.954	10.4444	3.98343	-1.19754
Atp6v0a1	14.7845	6.43964	3.2865	-1.19903
Clasp1	12.2486	5.3338	3.01485	-1.19938
Kat6a	12.968	5.64654	3.09713	-1.19952
Cmip	8.96226	3.89899	2.56348	-1.20076
Dennd1a	3.68732	1.60398	1.28211	-1.20092
Htt	7.9748	3.46648	2.39446	-1.20198
Tns3	19.5768	8.50096	3.68935	-1.20345
Rbms3	12.7048	5.50471	3.06398	-1.20664
Tpcn1	3.4145	1.47809	1.1677	-1.20794
Prr14	8.55544	3.70353	2.49287	-1.20794
Efnb1	13.7201	5.93444	3.17367	-1.20911
Timp3	67.2692	29.0409	5.46594	-1.21186
Slc12a2	35.0949	15.1446	4.52696	-1.21246
Kif21a	4.77694	2.06019	1.64943	-1.21331
2900026A02Rik	3.53104	1.51809	1.21118	-1.21784
Fam160a1	5.17842	2.22319	1.76257	-1.21988
Braf	10.8357	4.64987	2.82746	-1.22053
Runx3	4.36112	1.87067	1.51413	-1.22114
Ptprg	8.13691	3.48817	2.41348	-1.22201
Itpr1	7.67274	3.28562	2.32795	-1.22358
Lphn2	13.4022	5.73302	3.13185	-1.2251
Bbx	22.299	9.53453	3.86603	-1.22575
Igsf3	3.93309	1.68058	1.36231	-1.2267
Nisch	30.6951	13.0953	4.32546	-1.22896
Dlg5	10.3903	4.42852	2.762	-1.23034
Col1a2	659.856	280.591	8.74917	-1.23368
Fgfr2	12.7296	5.40315	3.05196	-1.23631
Igf2	27.6509	11.7298	4.17068	-1.23715
Col6a2	57.7687	24.5018	5.23352	-1.2374
Kidins220	14.7107	6.23775	3.25991	-1.23777
Ubap2	10.446	4.42669	2.76555	-1.23865
Nrp2	41.6203	17.6355	4.75981	-1.2388
Lyst	6.7414	2.85586	2.13349	-1.23912
Unc5c	6.27591	2.65822	2.03014	-1.23936
Ino80d	4.06165	1.72016	1.4023	-1.23952
Smpd3	3.76755	1.59543	1.29379	-1.23968
Rassf2	5.3934	2.28148	1.81058	-1.24123
Dusp18	3.71518	1.57128	1.27269	-1.24149
Mpdz	18.6795	7.9	3.60262	-1.24153
Gm13375	5.33006	2.25332	1.7931	-1.2421
Cdh13	36.7413	15.5243	4.57789	-1.24287
Klf13	7.04188	2.96802	2.19273	-1.24646
4930470H14Rik	7.16852	3.01575	2.2171	-1.24916
Wasf2	11.5664	4.85875	2.90623	-1.25128
Tecpr1	3.45827	1.45241	1.16425	-1.2516
Pi4ka	17.4103	7.30809	3.49568	-1.25237
Ubc	52.388	21.9856	5.08483	-1.25268
Plekhh2	10.9778	4.60224	2.82943	-1.25418
Fam20a	4.98532	2.089	1.69025	-1.25487
Pag1	3.4698	1.45362	1.16725	-1.2552
Cdc42ep1	26.4514	11.0742	4.0972	-1.25614
Tiam2	9.52655	3.98831	2.62387	-1.25618
Mcc	11.8814	4.95019	2.93906	-1.26315
Zfp592	3.30236	1.37313	1.09048	-1.26603
Gpnmb	19.0147	7.8964	3.61512	-1.26785
Zfp521	12.645	5.24595	3.02585	-1.26929
Rb1	11.1371	4.61889	2.84242	-1.26976
2410089E03Rik	8.36787	3.46338	2.42852	-1.27268
Atxn2	9.25022	3.81567	2.57071	-1.27755
Col5a1	27.5033	11.3436	4.14267	-1.27773
Cd74	8.67062	3.57602	2.47724	-1.27778
Gm4759	4.50748	1.85845	1.53321	-1.27822
Cx3cl1	10.7556	4.43051	2.78724	-1.27954
Insr	5.67669	2.33562	1.86443	-1.28124
Megf8	4.6081	1.89446	1.56298	-1.28239
4932438A13Rik	6.51906	2.67406	2.06185	-1.28563
Myh10	20.5148	8.41436	3.71572	-1.28574
Slc6a6	33.3817	13.6558	4.41621	-1.28954
Birc6	32.2231	13.1817	4.36524	-1.28956
Hcn1	3.86109	1.5788	1.30392	-1.29018
Mn1	4.19188	1.71364	1.42233	-1.29053
Slc7a1	20.046	8.19465	3.67996	-1.29056
Trio	13.8827	5.67433	3.14983	-1.29077
Sh3d19	30.2221	12.3414	4.27148	-1.2921
Asap1	23.503	9.59386	3.90844	-1.29266
Mxd4	30.5687	12.4637	4.28682	-1.29432
Pcnt	3.36175	1.37024	1.10182	-1.29478
Arhgef11	5.96473	2.42444	1.92705	-1.29881
Ephb3	8.68116	3.52626	2.46801	-1.29975
Lrch1	3.84484	1.55966	1.29208	-1.30169
9430020K01Rik	8.74368	3.54612	2.47724	-1.302
Fbrs	3.43259	1.39192	1.12819	-1.30222
Golga4	4.63785	1.87687	1.56089	-1.30513
Dhrs9	18.4924	7.47144	3.55512	-1.30747
Sap130	5.79825	2.34159	1.88155	-1.30813
Cit	3.3148	1.33837	1.0747	-1.30844
Arhgap21	14.8999	6.00666	3.2419	-1.31067
Brd4	11.7323	4.71893	2.89544	-1.31395
Eif2c2	13.6299	5.47951	3.11137	-1.31466
Lphn1	6.55834	2.6362	2.0559	-1.31487
Sesn3	12.7235	5.11186	3.01164	-1.31558
Dag1	41.9199	16.8357	4.73151	-1.31611
Ptpn14	8.24196	3.30752	2.38437	-1.31724
Srgap3	4.0583	1.62508	1.36069	-1.32036
Aldh1l2	46.5467	18.632	4.88016	-1.3209
Tgfb2	6.00408	2.4009	1.92476	-1.32237
Gab1	7.51451	3.00437	2.24837	-1.32262
Arid1b	6.73301	2.6889	2.08913	-1.32424
Zfhx4	11.0856	4.42656	2.8084	-1.32443
Chd3	13.3184	5.30752	3.07169	-1.32731
Phf2	5.0986	2.02864	1.68531	-1.32959
Chd6	4.1526	1.65011	1.38829	-1.33145
Mrgprf	9.4258	3.74411	2.57062	-1.33199
Nfib	39.5183	15.6673	4.63707	-1.33476
Npr3	15.1187	5.9916	3.2506	-1.33532
Slc5a3	30.0749	11.9114	4.24238	-1.33622
Irs2	9.21544	3.64754	2.53549	-1.33713
Nfic	12.0826	4.78069	2.92604	-1.33764
Zmiz2	4.0199	1.5903	1.33823	-1.33786
Ep400	9.79681	3.86953	2.62224	-1.34015
Disp1	3.36419	1.32873	1.08015	-1.34021
Nlgn2	5.07446	2.00388	1.67303	-1.34046
Deptor	4.2409	1.67116	1.41261	-1.34352
Kdm5b	6.23093	2.45492	1.96756	-1.34377
Nbea	5.35483	2.10872	1.7486	-1.34447
Tenc1	4.92349	1.93736	1.62689	-1.34559
Gpc6	14.6808	5.75602	3.20047	-1.35079
Zdhhc8	10.5027	4.11781	2.71728	-1.35081
Col6a1	103.628	40.5881	6.01913	-1.35229
Tlr3	8.30477	3.25222	2.37768	-1.35252
Islr	13.0042	5.09245	3.02463	-1.35255
Gaa	54.0164	21.1225	5.07802	-1.35462
Med13l	12.7716	4.97665	2.99502	-1.35969
Clu	10.5143	4.09579	2.71421	-1.36014
Sorbs3	16.8872	6.57721	3.39767	-1.36038
Abca2	4.96324	1.92674	1.62872	-1.36512
Gnao1	11.3833	4.40463	2.82393	-1.36983
Nup214	6.30689	2.43821	1.97138	-1.37111
Dock9	9.62577	3.72008	2.58112	-1.37157
Ptpn13	5.78046	2.23279	1.84502	-1.37234
Atxn2l	14.9692	5.77884	3.21735	-1.37315
Slit2	58.4319	22.5206	5.18093	-1.37551
Atxn1	3.7213	1.43341	1.20763	-1.37636
Cped1	10.2273	3.93762	2.66584	-1.37703
Runx2	8.38087	3.22569	2.37835	-1.37749
Apc	8.03703	3.09087	2.31734	-1.37865
Jup	4.75323	1.82762	1.55944	-1.37894
Ogn	67.398	25.8387	5.38305	-1.38317
Trp53inp2	8.86832	3.39301	2.45561	-1.3861
Cryab	22.671	8.65896	3.80848	-1.38858
Ncoa2	6.61034	2.52361	2.03011	-1.38924
Myo10	12.3066	4.69732	2.9266	-1.38952
Igf2r	20.8673	7.95674	3.68767	-1.39099
Rusc2	3.45076	1.3126	1.08967	-1.39449
Ylpm1	5.09326	1.937	1.65121	-1.39477
Pik3r1	20.4014	7.75849	3.65319	-1.39482
Cspg4	3.67442	1.39554	1.17917	-1.39669
Nacc2	4.86436	1.847	1.58372	-1.39707
Adamts1	151.277	57.4232	6.54231	-1.39749
Runx1t1	5.70338	2.16406	1.81278	-1.39808
Nf1	16.4729	6.2469	3.34258	-1.39888
Arhgef17	7.26543	2.75207	2.16078	-1.40053
Heatr5b	13.1478	4.97961	3.01639	-1.40072
Bod1l	11.5249	4.36383	2.82614	-1.40109
Ep300	7.85314	2.97329	2.27266	-1.40121
Myo18a	7.12254	2.69635	2.1317	-1.40138
Cep350	3.77116	1.42762	1.21431	-1.4014
Macf1	14.2166	5.37558	3.12796	-1.40308
Ttyh3	7.23684	2.73593	2.1537	-1.40333
Gltscr1l	4.47609	1.68677	1.45825	-1.40798
Irs1	19.9571	7.51947	3.61473	-1.4082
C3	87.2908	32.8791	5.74343	-1.40866
Lrp5	6.52242	2.45454	2.00043	-1.40995
Dvl3	4.75196	1.78566	1.54249	-1.41207
Malat1	238.843	89.7274	7.1937	-1.41244
Rere	6.27899	2.35782	1.94399	-1.41308
Helz	3.64384	1.36773	1.15862	-1.41368
Wnk1	43.1675	16.1737	4.72373	-1.4163
Vps13c	6.12624	2.28389	1.90325	-1.42351
Mycbp2	9.34147	3.47872	2.5111	-1.42509
Ephx1	7.25249	2.70034	2.14581	-1.42534
Hipk2	6.45108	2.39301	1.97418	-1.43071
Dlc1	11.3723	4.21716	2.79186	-1.43118
Tln1	45.94	17.0324	4.80594	-1.43147
Arhgap32	4.19684	1.55345	1.35239	-1.43383
Aff1	10.2367	3.78782	2.63852	-1.43431
Sptbn1	53.1283	19.6559	5.01415	-1.43452
Sh3pxd2b	13.9511	5.14173	3.08228	-1.44005
Bptf	8.38929	3.09127	2.34837	-1.44035
Sox9	19.2436	7.08216	3.54525	-1.44212
Setd1a	5.08993	1.87219	1.62619	-1.44292
Vps13d	3.97383	1.46101	1.26875	-1.44356
Apbb2	27.2119	9.97046	4.04191	-1.44851
Vdr	7.92188	2.90208	2.26147	-1.44876
Fzd5	3.85684	1.41234	1.22275	-1.44933
Igf1r	10.8107	3.95317	2.7087	-1.45138
Atf7ip	11.8336	4.325	2.83876	-1.45212
Col4a6	5.9452	2.17228	1.84547	-1.45252
Cd248	13.9759	5.10452	3.07832	-1.45309
Sh3rf3	4.23224	1.54576	1.35487	-1.45311
Scd1	194.569	71.0362	6.87731	-1.45366
Lama4	25.0416	9.13666	3.91896	-1.45459
Jag1	8.00235	2.91912	2.27298	-1.45489
Aak1	9.28709	3.3861	2.48743	-1.4556
Zfpm1	3.52982	1.28497	1.09066	-1.45786
Kcnj2	28.1072	10.2271	4.0836	-1.45854
Rrbp1	25.1106	9.12451	3.91999	-1.46048
Pdgfra	50.9187	18.4994	4.93977	-1.46072
Atg2a	3.44715	1.24787	1.05244	-1.46594
Lphn3	4.77348	1.72736	1.52181	-1.46647
Prrc2b	14.1712	5.12053	3.09059	-1.4686
Pcnxl3	7.22384	2.60661	2.11747	-1.47059
Col4a1	55.9172	20.151	5.069	-1.47244
Flnb	67.0139	24.1488	5.33013	-1.47251
Ptpn23	5.31728	1.91494	1.67399	-1.47339
Man1c1	3.44161	1.238	1.04555	-1.47507
Sik1	16.1115	5.78789	3.27153	-1.47698
Zmynd8	18.3739	6.59043	3.45998	-1.47921
Paqr8	4.47308	1.60396	1.42145	-1.47963
Mast4	6.40059	2.28277	1.9345	-1.48742
Atn1	5.71502	2.03708	1.77063	-1.48826
Calcoco1	7.06419	2.51344	2.07509	-1.49086
Slc29a3	3.86125	1.3708	1.20204	-1.49405
Gpr126	8.08105	2.86433	2.26637	-1.49635
Baz2a	4.49992	1.59238	1.42054	-1.49871
Numa1	13.6962	4.84427	3.02599	-1.49942
Mylk	4.61068	1.62708	1.45363	-1.50269
Ncoa6	7.38888	2.60546	2.13345	-1.50382
Mll3	4.30522	1.51699	1.35365	-1.50488
Adamtsl3	3.58387	1.25474	1.08445	-1.51413
Plxna1	32.213	11.2779	4.2525	-1.51414
Steap4	7.15328	2.50378	2.08136	-1.5145
Nfix	38.7916	13.5509	4.51899	-1.51736
Lpp	26.4733	9.2422	3.96735	-1.51823
Tead1	14.622	5.07965	3.1074	-1.52534
Thsd7a	4.07256	1.41385	1.26278	-1.52631
Huwe1	34.2856	11.9002	4.33622	-1.52662
Hcfc1	23.8868	8.26022	3.81216	-1.53196
Scd2	628.104	216.789	8.5275	-1.53471
Abca3	4.74432	1.63617	1.47826	-1.53588
Amot	16.7025	5.75511	3.29342	-1.53715
Cacna1c	4.38551	1.50692	1.36217	-1.54114
Arhgap23	10.0087	3.4361	2.55198	-1.54241
Akap13	4.5089	1.54651	1.4009	-1.54376
Rgma	5.56108	1.90657	1.70317	-1.54439
Tcf7l2	3.88555	1.33153	1.1856	-1.54503
Zfp462	3.85089	1.31963	1.17266	-1.54506
Synpo	5.71781	1.95896	1.74278	-1.54537
Svil	5.44722	1.86559	1.67258	-1.54589
Afap1	10.2312	3.50324	2.5818	-1.54621
Lamc1	32.6878	11.1925	4.25757	-1.54622
Zfyve26	3.53823	1.20465	1.04582	-1.55441
Arid5b	13.2034	4.48083	2.9433	-1.55907
Col4a2	24.5209	8.30565	3.83502	-1.56185
Crebbp	11.2066	3.79173	2.70457	-1.56342
Tln2	12.0737	4.07988	2.81116	-1.56527
Notch2	14.5573	4.9185	3.08094	-1.56545
Col12a1	10.9223	3.69029	2.66647	-1.56547
Dip2b	10.7899	3.63793	2.64736	-1.56849
Gas6	4.78277	1.60753	1.47135	-1.573
Myh9	101.151	33.9256	5.87233	-1.57606
Tnrc6b	4.07166	1.36186	1.2356	-1.58004
Herc2	7.60152	2.53838	2.1351	-1.58238
Nfat5	14.9033	4.97258	3.10578	-1.58357
C230081A13Rik	10.2972	3.42556	2.57026	-1.58784
Prrc2a	36.0066	11.9246	4.37303	-1.59432
Wfdc12	4.36717	1.44543	1.3291	-1.5952
Epha4	11.7109	3.87036	2.75112	-1.59731
Ahnak	152.3	50.2866	6.45144	-1.59867
Adamts9	12.6301	4.15387	2.85663	-1.60434
Creb3l2	7.36499	2.411	2.07516	-1.61105
Piezo1	20.8198	6.76616	3.56911	-1.62155
Pkd1	11.7376	3.80653	2.74077	-1.62459
Prrc2c	21.196	6.86947	3.59296	-1.62552
Plxnd1	13.4191	4.33722	2.93149	-1.62945
Flnc	34.0872	10.974	4.27359	-1.63514
Mtss1l	5.19598	1.67277	1.55982	-1.63516
Ppargc1a	4.16767	1.33645	1.23882	-1.64084
Acaca	49.0697	15.6564	4.79272	-1.64808
Tanc2	8.1416	2.59529	2.2006	-1.64942
Pdgfrb	35.8282	11.4053	4.33733	-1.65139
Nrk	4.25727	1.35129	1.26213	-1.65559
Iqsec1	11.8345	3.7392	2.73383	-1.6622
Hivep1	4.96246	1.5613	1.4769	-1.66831
Trrap	12.4677	3.89987	2.80177	-1.6767
Gstm1	43.7071	13.585	4.60687	-1.68585
Mll1	4.01645	1.24398	1.16044	-1.69096
Maml2	6.42676	1.98387	1.8362	-1.69577
Utrn	11.967	3.69333	2.73296	-1.69607
Fryl	6.01283	1.84523	1.73592	-1.70424
Arid1a	4.63496	1.42043	1.35944	-1.70623
Clip3	5.86858	1.79311	1.69774	-1.71055
Med12	7.32101	2.22553	2.0131	-1.71789
Grik5	6.39339	1.94143	1.81685	-1.71946
Aim1	7.96702	2.41706	2.13365	-1.72079
Ankrd11	17.4066	5.2505	3.25701	-1.72911
Ank2	8.87092	2.65236	2.27818	-1.74181
Wdfy3	7.75669	2.29764	2.0778	-1.75529
8430408G22Rik	9.64983	2.84745	2.39009	-1.76083
Sec16a	11.6624	3.43117	2.66125	-1.76509
Srpx2	11.0452	3.24911	2.5827	-1.7653
Golgb1	5.38695	1.58184	1.54554	-1.76786
Cdon	12.9502	3.79475	2.80945	-1.7709
Dhrs3	5.08595	1.46241	1.44743	-1.79817
Lpin1	17.2593	4.93507	3.20619	-1.80623
Srrm2	55.2567	15.6711	4.87906	-1.81804
Col1a1	230.452	64.7788	6.93289	-1.83087
Fn1	255.629	71.7147	7.08105	-1.83371
Foxk1	5.94788	1.66082	1.65214	-1.84048
Zbtb20	3.92351	1.08907	1.04762	-1.84905
Slc6a9	14.2231	3.93905	2.90401	-1.85232
Trp53inp1	4.30896	1.17263	1.16854	-1.87759
Cic	15.0791	4.0438	2.9651	-1.89877
Fat1	39.9543	10.6962	4.36965	-1.90125
Cdsn	10.2145	2.73278	2.40146	-1.90218
Dync1h1	33.7101	8.99924	4.12246	-1.90531
Itga11	4.85888	1.25507	1.3042	-1.95286
Limch1	8.06111	2.07921	2.03351	-1.95494
Dst	12.3304	3.17551	2.64557	-1.95716
Aff3	5.43515	1.38966	1.45853	-1.96759
Zmiz1	5.56708	1.41652	1.48964	-1.97457
Map1b	23.3488	5.88677	3.55138	-1.9878
Itga1	14.7552	3.71368	2.888	-1.9903
Gas7	9.27925	2.32498	2.21561	-1.99679
Ubr4	19.1866	4.75937	3.2564	-2.01126
Nhsl1	4.65264	1.14462	1.20646	-2.02318
Fasn	76.322	18.4738	5.23072	-2.04662
Bcl9l	6.73629	1.62075	1.72431	-2.05529
Slit3	7.84515	1.86304	1.93473	-2.07414
Akap12	22.8681	5.34936	3.46732	-2.0959
Kif21b	6.21214	1.39468	1.55751	-2.15516
Zfhx3	4.29589	0.960586	1.02247	-2.16097
Tnrc18	8.56744	1.8889	2.00821	-2.18132
Plec	35.2357	7.64121	4.03638	-2.20516
Map1a	5.51644	1.18976	1.3572	-2.21307
Lrp1	34.3596	7.31582	3.98683	-2.23162
Heg1	11.798	2.41984	2.41769	-2.28556
Svep1	15.923	2.81925	2.74418	-2.49773
Hspg2	34.0795	6.00175	3.83811	-2.50545
Abca1	10.1233	1.62118	2.01833	-2.64256
Fat4	5.84806	0.887098	1.18756	-2.72079
